# Supplementary material for: Green fluorescent proteins show divergent patterns among species and strains of Porites from the Great Barrier Reef
Source: Research Square preprint supplement (doi:10.21203/rs.3.rs-6761998/v1), 2025-07-17
Supplement: Supplementary file 1 [file 9a5345070b2fa97d3751f8d3.xlsx]

## Sheet: Table_S1
Table S1. Sequencing metadata associated with coral samples used for phylogenetic analysis. Quality score is the average quality value of all reads, QV20+ is the number of reads with a Quality Value ≥20. SI is average signal intensity for the indicated base.
Sample	Direction	% GC	Contiguous Read Length	Read Length	Quality Score	QV20+	SI A	SI C	SI G	SI T	Sequencing Date
P02	Forward	0.43	468	736 bp	35	587	1779	1999	1565	2252	2023-07-28 19:13:02
P02	Reverse	0.45	521	738 bp	32	570	1430	1673	1392	1411	2023-08-02 03:09:08
P03	Unpaired	0.45	744	743 bp	51	729	715	744	792	712	2023-07-28 04:55:32
P04	Unpaired	0.45	736	739 bp	51	726	1985	2124	2142	2025	2023-07-28 04:55:32
P05	Unpaired	0.45	738	740 bp	51	726	1334	1366	1444	1372	2023-07-28 04:55:32
P06	Forward	0.44	136	734 bp	24	393	1369	1457	1197	1430	2023-07-28 19:13:02
P06	Reverse	0.43	123	711 bp	21	390	1526	1832	1518	1342	2023-08-02 03:09:08
P07	Forward	0.46	137	214 bp	17	185	1602	1716	1527	1829	2023-07-28 19:13:02
P07	Reverse	0.43	208	672 bp	26	374	2327	2685	2237	2210	2023-08-02 03:09:08
P08	Forward	0.45	733	738 bp	30	607	2474	2385	2568	2298	2023-07-28 04:55:32
P08	Reverse	0.45	724	737 bp	28	614	1754	2226	1691	1675	2023-08-02 03:09:08
P09	Forward	0.44	732	737 bp	36	623	4133	4140	3758	4755	2023-07-28 19:13:02
P09	Reverse	0.45	729	736 bp	34	654	2206	2652	2213	2143	2023-08-02 03:09:08
P11	Forward	0.43	276	734 bp	33	516	1278	1274	1129	1514	2023-07-28 19:13:02
P11	Reverse	0.44	441	704 bp	40	527	2802	3546	2681	2757	2023-08-02 03:09:08
PE01	Unpaired	0.45	736	740 bp	53	733	1874	2064	1910	1838	2023-08-29 01:58:44
PE02	Forward	0.44	732	728 bp	43	704	1882	2028	1863	1838	2023-08-29 01:58:44
PE02	Reverse	0.45	735	732 bp	53	722	1748	1749	1829	1621	2023-08-29 01:58:44
PE03	Unpaired	0.45	735	731 bp	53	722	1748	1749	1829	1621	2023-08-29 01:58:44
PE04	Unpaired	0.44	539	693 bp	45	587	2188	2224	2336	2140	2023-08-29 01:58:44
PE05	Forward	0.44	276	737 bp	32	495	2779	2656	2726	2562	2023-08-29 01:58:44
PE05	Reverse	0.45	725	706 bp	49	721	3781	5528	4069	4880	2023-09-20 00:58:21
PL01	Unpaired	0.44	654	707 bp	50	677	4312	4565	4607	4171	2023-08-29 01:58:44
PL02	Unpaired	0.45	747	744 bp	54	740	4178	4496	4173	3912	2023-08-29 01:58:44
PL03	Unpaired	0.45	746	750 bp	53	737	3438	3724	3498	3321	2023-08-29 01:58:44
PL04	Unpaired	0.45	744	748 bp	53	737	4008	4355	4213	3832	2023-08-29 01:58:44
PL05	Unpaired	0.46	731	743 bp	52	716	3941	4034	4244	3699	2023-08-29 01:58:44
PL06	Unpaired	0.45	642	703 bp	49	668	2519	2687	2712	2418	2023-08-29 01:58:44
PL07	Unpaired	0.45	643	744 bp	50	694	2964	3187	3143	2865	2023-08-29 01:58:44
PL08	Unpaired	0.46	644	648 bp	49	667	2264	2306	2294	2003	2023-08-29 01:58:44
PL09	Forward	0.45	147	371 bp	22	283	3482	3661	3664	3267	2023-08-29 01:58:44
PL09	Reverse	0.44	426	459 bp	37	500	3447	5005	3557	4135	2023-09-20 00:58:21
PL10	Unpaired	0.46	591	593 bp	46	615	1692	1775	1663	1595	2023-08-29 01:58:44
PL11	Forward	0.45	321	392 bp	31	396	3103	3016	3158	2951	2023-08-29 01:58:44
PL11	Reverse	0.44	410	500 bp	37	486	3188	4663	3510	3811	2023-09-20 00:58:21
PL12	Forward	0.46	733	744 bp	40	673	4971	5143	5193	4693	2023-08-29 01:58:44
PL12	Reverse	0.46	740	747 bp	33	683	1144	1549	1347	1358	2023-09-20 17:14:24
PL13	Unpaired	0.46	641	638 bp	49	660	4417	4491	4432	4080	2023-08-29 01:58:44

## Sheet: Table_S2
Table S2. Metadata associated with NCBI popset accessions used for custom rDNA database for phylogenetic analysis. Database includes Porites, Galaxea, and Siderastrea rDNA sequences representing global taxonomic diversity.
Name	% GC	Accession	Organism	Description	Molecule Type	Created Date	Sequence	Sequence Length	Taxonomy	clone	country	db_xref	isolate	specimen_voucher	strain	Assembly-Data: Assembly Method	Assembly-Data: Sequencing Technology
AY722788	0.467	AY722788.1	Porites lutea	Porites lutea clone PEN175.3 18S ribosomal RNA gene, partial sequence; internal transcribed spacer 1, 5.8S ribosomal RNA gene, and internal transcribed spacer 2, complete sequence; and 28S ribosomal RNA gene, partial sequence	DNA	Mon Dec 31 00:00:00 EST 2007	ACTACCGATTGAATGGTTTAGTGAGGCCTTCTGACTGGCGCCGCTACTCTGGCAACAGAGCGGCGGATGCCGGGAAGTTGGTCAAACTTGATCATTTAGAGGAAGTAAAAGTCGTAACAAGGTTTCCGTAGGTGAACCTGCGGAAGGATCATTACCGATGTGAAAGAATCCAAGGTTAAACATCATTAACCAGTGTGAACTGTGAAACAACTCTTTAGGGGTCGGCACAGGCGTGTGTCGTTAAATGGCGGATAGGTTCCTTCCGCCAGCCCCGCCATTGTGTTTATGATATCACTTTGAACGTTAAAGACTGAGAACGTATGTATCATGCATAATACAATGTATGAGAAAGAAGGAAAGAAAAATGAGAGACAACTTTTGACGGTGGATCTCTTGGCT…	1013	Eukaryota; Metazoa; Cnidaria; Anthozoa; Hexacorallia; Scleractinia; Fungiina; Poritidae; Porites	PEN175.3	Taiwan: Penghu Island	taxon:51062
FN564990	0.449	FN564990.1	Porites lobata	Porites lobata genomic DNA containing 18S rRNA gene, ITS1, 5.8S rRNA gene, ITS2 and 28S rRNA gene, isolate B16-01	DNA	Wed Apr 21 00:00:00 EDT 2010	TCAGCGGGTAGCCTTGCCTGATCTGAGGTCAAGATTTGATGTTTATTGTCACTCACCGCTTTGATTGGACTTTGTTTCTGCTATTGCATGTTTGGGCGAAGGAAAATATTATCTTTAGCCTTCGCACTCAAGTTTCAATAGAGAATGCGAGTCCAATGCTGCTGTCCTTCAAGGGACACGGCGATTTAATGCTTGCTTGCTAACACGCCGTGACACCTCAATACCGCACTCACGAGTGCGTTCGATAAAATCCGACACTCAGACAGACATGCTCCTGGGAGAACCCAAGAGCGCCATTTGCGTTCAAAGATTCAATGATTCACTGAATTCTGCAATTCACACTACATATCGCAGCTGGCTGCGTTCTTCATCGATACGTGAGCCAAGAGATCCACCGTC…	652	Eukaryota; Metazoa; Cnidaria; Anthozoa; Hexacorallia; Scleractinia; Fungiina; Poritidae; Porites		American Samoa:Ofu Island	taxon:104759	B16-01
FN564994	0.451	FN564994.1	Porites lobata	Porites lobata genomic DNA containing 18S rRNA gene, ITS1, 5.8S rRNA gene, ITS2 and 28S rRNA gene, isolate B16-10	DNA	Wed Apr 21 00:00:00 EDT 2010	TCAGCGGGTAGCCTTGCCTGATCTGAGGTCAAGATTTGATGTTTATTGTCACTCACCGCTTTGATTGGACCTTGTTTCTGCTATTGCATGTTTGGGCGAAGGAAAATATTATCTTTAGCCTTCGCACTCAAGTTTCAATAGAGAATGCGAGTCCAATGCTGCTGTCCTTCAAGGGACACGGCGATTTAATGCTTGCTTGCTAACACGCCGTGACACCTCAATACCGCACTCACGAGTGCGTTCGATAAAATCCGACACTCAGACAGACATGCTCCTGGGAGAACCCAAGAGCGCCATTTGCGTTCAAAGATTCAATGATTCACTGAATTCTGCAATTCACACTACATATCGCAGCTGGCTGCGTTCTTCATCGATACGTGAGCCAAGAGATCCACCGTC…	652	Eukaryota; Metazoa; Cnidaria; Anthozoa; Hexacorallia; Scleractinia; Fungiina; Poritidae; Porites		American Samoa:Ofu Island	taxon:104759	B16-10
FN565039	0.449	FN565039.1	Porites lobata	Porites lobata genomic DNA containing 18S rRNA gene, ITS1, 5.8S rRNA gene, ITS2 and 28S rRNA gene, isolate F01-06	DNA	Wed Apr 21 00:00:00 EDT 2010	TCAGCGGGTAGCCTTGCCTGATCTGAGGTCAAGATTTGATGTTTATTGTCTGTCACCGCTTTGATTGGACTTTGTTTCTGCTATTGCATGTTTGGGCGAAGGAAAATATTATCTTTAGCCTTCGCACTCAAGTTTCAATAGAGAATGCGAGTCCAATGCTGCTGTCCTTCAAGGGACACGGCGATTTAATGCTTGCTTGCTAACACGCCGTGACACCTCAATACCGCACTCACGAGTGCGTTCGATAAAATCCGACACTCAGACAGACATGCTCCTGGGAGAACCCAAGAGCGCCATTTGCGTTCAAAGATTCAATGATTCACTGAATTCTGCAATTCACACTACATATCGCAGCTGGCTGCGTTCTTCATCGATACGTGAGCCAAGAGATCCACCGTC…	644	Eukaryota; Metazoa; Cnidaria; Anthozoa; Hexacorallia; Scleractinia; Fungiina; Poritidae; Porites		American Samoa:Ofu Island	taxon:104759	F01-06
FN565051	0.448	FN565051.1	Porites lobata	Porites lobata genomic DNA containing 18S rRNA gene, ITS1, 5.8S rRNA gene, ITS2 and 28S rRNA gene, isolate F03-04	DNA	Wed Apr 21 00:00:00 EDT 2010	TCAGCGGGTAGCCTTGCCTGATCTGAGGTCAAGATTTGATGTTTATTGTCTGTCACCGCTTTGATTGGATTTTGTTTCTGCTATTGCATGTTTGGGCGAAGGAAAATATTATCTTTAGCCTTCGCACTCAAGTTTCAATAGAGAATGCGAGTCCAATGCTGCTGTCCTTCAAGGGACACGGCGATTTAATGCTTGCTTGCTAACACGCCGTGACACCTCAATACCGCACTCACGAGTGCGTTCGATAAAATCCGACACTCAGACAGACATGCTCCTGGGAGAACCCAAGAGCGCCATTTGCGTTCAAAGATTCAATGATTCACTGAATTCTGCAATTCACACTACATATCGCAGCTGGCTGCGTTCTTCATCGATACGTGAGCCAAGAGATCCACCGTC…	645	Eukaryota; Metazoa; Cnidaria; Anthozoa; Hexacorallia; Scleractinia; Fungiina; Poritidae; Porites		American Samoa:Ofu Island	taxon:104759	F03-04
FN565053	0.45	FN565053.1	Porites lobata	Porites lobata genomic DNA containing 18S rRNA gene, ITS1, 5.8S rRNA gene, ITS2 and 28S rRNA gene, isolate F04-01	DNA	Wed Apr 21 00:00:00 EDT 2010	TCAGCGGGTAGCCTTGCCTGATCTGAGGTCAAGATTTGATGTTTATTGTCACTCACCGCTTTGATTGGATCTTGTTTCTGCTATTGCATGTTTGGGCGAAGGAAAATATTATCTTTAGCCTTCGCACTCAAGTTTCAATAGAGAATGCGAGTCCAATGCTGCTGTCCTTCAAGGGACACGGCGATTTAATGCTTGCTTGCTAACACGCCGTGACACCTCAATACCGCACTCACGAGTGCGTTCGATAAAATCCGACACTCAGACAGACATGCTCCTGGGAGAACCCAAGAGCGCCATTTGCGTTCAAAGATTCAATGATTCACTGAATTCTGCAATTCACACTACATATCGCAGCTGGCTGCGTTCTTCATCGATACGTGAGCCAAGAGATCCACCGTC…	649	Eukaryota; Metazoa; Cnidaria; Anthozoa; Hexacorallia; Scleractinia; Fungiina; Poritidae; Porites		American Samoa:Ofu Island	taxon:104759	F04-01
FN565056	0.45	FN565056.1	Porites lobata	Porites lobata genomic DNA containing 18S rRNA gene, ITS1, 5.8S rRNA gene, ITS2 and 28S rRNA gene, isolate F04-08	DNA	Wed Apr 21 00:00:00 EDT 2010	TCAGCGGGTAGCCTTGCCTGATCTGAGGTCAAGATTTGATGTTTATTGTCACTCACCGCTTTGATTGGATCTTGTTTCTGCTATTGCATGTTTGGGCGAAGGAAAATATTATCTTTAGCCTTCGCTCTCAAGTTTCAATAGAGAATGCGAGTCCAATGCTGCTGTCCTTCAAGGGACACGGCGATTTAATGCTTGCTTGCTAACACGCCGTGACACCTCAATACCGCACTCACGAGTGCGTTCGATAAAATCCGACACTCAGACAGACATGCTCCTGGGAGAACCCAAGAGCGCCATTTGCGTTCAAAGATTCAATGATTCACTGAATTCTGCAATTCACACTACATATCGCAGCTGGCTGCGTTCTTCATCGATACGTGAGCCAAGAGATCCACCGTC…	649	Eukaryota; Metazoa; Cnidaria; Anthozoa; Hexacorallia; Scleractinia; Fungiina; Poritidae; Porites		American Samoa:Ofu Island	taxon:104759	F04-08
FN565057	0.452	FN565057.1	Porites lobata	Porites lobata genomic DNA containing 18S rRNA gene, ITS1, 5.8S rRNA gene, ITS2 and 28S rRNA gene, isolate F08-02	DNA	Wed Apr 21 00:00:00 EDT 2010	TCAGCGGGTAGCCTTGCCTGATCTGAGGTCAAGATTTGATGTTTATTGTCACTCACCGCTTTGATTGGATCTTGTTTCTGCTATTGCATGTTTGGGCGAAGGAAAATATTATCTTTAGCCTTCGCACTCAAGTTTCAATAGAGAATGCGAGTCCAATGCTGCTGTCCTTCAAGGGACACGGCGATTTAATGCTTGCTTGCTAACACGCCGTGACACCTCAATACCGCACTCACGAGTGCGTTCGATAAAATCCGACACTCAGACAGACATGCTCCTGGGGGAACCCAAGAGCGCCATTTGCGTTCAAAGATTCAATGATTCACTGAATTCTGCAATTCACACTACATATCGCAGCTGGCTGCGTTCTTCATCGATACGTGAGCCAAGAGATCCACCGTC…	650	Eukaryota; Metazoa; Cnidaria; Anthozoa; Hexacorallia; Scleractinia; Fungiina; Poritidae; Porites		American Samoa:Ofu Island	taxon:104759	F08-02
FN565058	0.45	FN565058.1	Porites lobata	Porites lobata genomic DNA containing 18S rRNA gene, ITS1, 5.8S rRNA gene, ITS2 and 28S rRNA gene, isolate F08-05	DNA	Wed Apr 21 00:00:00 EDT 2010	TCAGCGGGTAGCCTTGCCTGATCTGAGGTCAAGATTTGATGTTGTCATTGTCTGTCACCGCTTTGATTGGATTTTGTTTCTGCTATTGCATGTTTGGGCGAAGGAAAATATTATCTTTAGCCTTCGCACTCAAGTTTCAATAGAGAATGCGAGTCCAATGCTGCTGTCCTTCAAGGGACACGGCGATTTAATGCTTGCTTGCTAACACGCCGTGACACCTCAATACCGCACTCACGAGTGCGTTCGATAAAATCCGACACTCAGACAGACATGCTCCTGGGAGAACCCAAGAGCGCCATTTGCGTTCAAAGATTCAATGATTCACTGAATTCTGCAATTCACACTACATATCGCAGCTGGCTGCGTTCTTCATCGATACGTGAGCCAAGAGATCCACCG…	655	Eukaryota; Metazoa; Cnidaria; Anthozoa; Hexacorallia; Scleractinia; Fungiina; Poritidae; Porites		American Samoa:Ofu Island	taxon:104759	F08-05
FN565060	0.45	FN565060.1	Porites lobata	Porites lobata genomic DNA containing 18S rRNA gene, ITS1, 5.8S rRNA gene, ITS2 and 28S rRNA gene, isolate F08-08	DNA	Wed Apr 21 00:00:00 EDT 2010	TCAGCGGGTAGCCTTGCCTGATCTGAGGTCAAGATTTGATGTTTATTGTCACTCACCGCTTTGATTGGATCTTGTTTCTGCTATTGCATGTTTGGGCGAAGGAAAATATTATCTTTAGCCTTCGCACTCAAGTTTCAATAGAGAATGCGAGTCCAATGCTGCTGTCCTTCAAGGGACACGGCGATTTAATGCTTGCTTGCTAACACGCCGTGACACCTCAATACCGCACTCACGAGTGCGTTCGATAAAATCCGACACTCAGACAGACATGCTCCTGGGAGAACCCAAGAGCGCCATTTGCGTTCAAAGATTCAATGATTCACTGAATTCTGCAATTCACACTACATATCGCAGCTGGCTGCGTTCTTCATCGATACGTGAGCCAAGAGATCCACCGTC…	649	Eukaryota; Metazoa; Cnidaria; Anthozoa; Hexacorallia; Scleractinia; Fungiina; Poritidae; Porites		American Samoa:Ofu Island	taxon:104759	F08-08
FN565062	0.448	FN565062.1	Porites lobata	Porites lobata genomic DNA containing 18S rRNA gene, ITS1, 5.8S rRNA gene, ITS2 and 28S rRNA gene, isolate F09-01	DNA	Wed Apr 21 00:00:00 EDT 2010	TCAGCGGGTAGCCTTGCCTGATCTGAGGTCAAGATTTGATGTTTATTGTCACTCACCGCTTTGATTGGATTTTGTTTCTGCTATTGCATGTTTGGGCGAAGGAAAATATTATCTTTAGCCTTCGCACTCAAGTTTCAATAGAGAATGCGAGTCCAATGCTGCTGTCCTTCAAGGGACACGGCGATTTAATGCTTGCTTGCTAACACGCCGTGACACCTCAATACCGCACTCACGAGTGCGTTCGATAAAATCCGACACTCAGACAGACATGCTCCTGGGAGAACCCAAGAGCGCCATTTGCGTTCAAAGATTCAATGATTCACTGAATTCTGCAATTCACACTACATATCGCAGCTGGCTGCGTTCTTCATCGATACGTGAGCCAAGAGATCCACCGTC…	649	Eukaryota; Metazoa; Cnidaria; Anthozoa; Hexacorallia; Scleractinia; Fungiina; Poritidae; Porites		American Samoa:Ofu Island	taxon:104759	F09-01
FN565066	0.45	FN565066.1	Porites lobata	Porites lobata genomic DNA containing 18S rRNA gene, ITS1, 5.8S rRNA gene, ITS2 and 28S rRNA gene, isolate F09-11	DNA	Wed Apr 21 00:00:00 EDT 2010	TCAGCGGGTAGCCTTGCCTGATCTGAGGTCAAGATTTGATGTTTATTGTCACTCACCGCTTTGATTGGATTTTGTTTCTGCTATTGCATGTTTGGGCGAAGGAAAATATTATCTTTAGCCTTCGCACTCAAGTTTCAATAGAGAATGCGAGTCCAATGCTGCTGTCCTTCAAGGGACACGGCGATTTAATGCTTGCTTGCTAACACGCCGTGACACCTCAATACCGCACTCACGAGTGCGTTCGATAAAATCCGACACTCAGACAGACATGCTCCTGGGAGAACCCAAGAGCGCCATTTGCGTTCAAAGATTCAATGATTCACTGAATTCTGCAATTCACACTACATATCGCAGCTGGCTGCGTTCTCCATCGATACGTGAGCCAAGAGATCCACCGTC…	649	Eukaryota; Metazoa; Cnidaria; Anthozoa; Hexacorallia; Scleractinia; Fungiina; Poritidae; Porites		American Samoa:Ofu Island	taxon:104759	F09-11
FN565091	0.448	FN565091.1	Porites lobata	Porites lobata genomic DNA containing 18S rRNA gene, ITS1, 5.8S rRNA gene, ITS2 and 28S rRNA gene, isolate F16-01	DNA	Wed Apr 21 00:00:00 EDT 2010	TCAGCGGGTAGCCTTGCCTGATCTGAGGTCAAGATTTGATGTTTATTGTCACTCACCGCTTTGATTGGATTTTGTTTCTGCTATTGCATGTTTGGGCGAAGGAAAATATTATCTTTAGCCTTCGCACTCAAGTTTCAATAGAGAATGCGAGTCCAATGCTGCTGTCCTTCAAGGGACACGGCGATTTAATGCTTGCTTGCTAACACGCCGTGACACCTCAATACCGCACTCACGAGTGCGTTCGATAAAATCCGACACTCAGACAGACATGCTCCTGGGAGAACCCAAGAGCGCCATTTGCGTTCAAAGATTCAATGATTCACTGAATTCTGCAATTCACACTACATATCGCAGCTGGCTGCGTTCTTCATCGATACGTGAGCCAAGAGATCCACCGTC…	649	Eukaryota; Metazoa; Cnidaria; Anthozoa; Hexacorallia; Scleractinia; Fungiina; Poritidae; Porites		American Samoa:Ofu Island	taxon:104759	F16-01
FN565095	0.45	FN565095.1	Porites lobata	Porites lobata genomic DNA containing 18S rRNA gene, ITS1, 5.8S rRNA gene, ITS2 and 28S rRNA gene, isolate F16-09	DNA	Wed Apr 21 00:00:00 EDT 2010	TCAGCGGGTAGCCTTGCCTGATCTGAGGTCAAGATTTGATGTTTATTGCCACTCACCGCTTTGATTGGATTTTGTTTCTGCTATTGCATGTTTGGGCGAAGGAAAATATTATCTTTAGCCTTCGCACTCAAGTTTCAATAGAGAATGCGAGTCCAATGCTGCTGTCCTTCAAGGGACACGGCGATTTAATGCTTGCTTGCTAACACGCCGTGACACCTCAATACCGCACTCACGAGTGCGTTCGATAAAATCCGACACTCAGACAGACATGCTCCTGGGAGAACCCAAGAGCGCCATTTGCGTTCAAAGATTCAATGATTCACTGAATTCTGCAATTCACACTACATATCGCAGCTGGCTGCGTTCTTCATCGATACGTGAGCCAAGAGATCCACCGTC…	649	Eukaryota; Metazoa; Cnidaria; Anthozoa; Hexacorallia; Scleractinia; Fungiina; Poritidae; Porites		American Samoa:Ofu Island	taxon:104759	F16-09
FN565096	0.447	FN565096.1	Porites lobata	Porites lobata genomic DNA containing 18S rRNA gene, ITS1, 5.8S rRNA gene, ITS2 and 28S rRNA gene, isolate F16-10	DNA	Wed Apr 21 00:00:00 EDT 2010	TCAGCGGGTAGCCTTGCCTGATCTGAGGTCAAGATTTGATGTTTATTGTCACTCACCGCTTTGATTGGATTTTGTTTCTGCTATTGCATGTTTGGGCGAAGGAAAATATTATCTTTAGCCTTCGCACTCAAGTTTCAATAGAGAATGCGAGTCCAATGCTGCTGTCCTTCAAGGGACACGGCGATTTAATGCTTGCTTGCTAACACGCCGTGACACCTCAATACCGCACTCACGAGTGCGTTCGATAAAATCCGACACTCAGACAGACATGCTCCTGGGAGAACCCAAGAGCGCCATTTGCGTTCAAAGATTCAATGATTCACTGAATTCTGCAATTCACACTACATATCGCAGCTGGCTGCGTTCTTCATCGATACGTGAGCCAAGAGATCCACCGTC…	649	Eukaryota; Metazoa; Cnidaria; Anthozoa; Hexacorallia; Scleractinia; Fungiina; Poritidae; Porites		American Samoa:Ofu Island	taxon:104759	F16-10
FN565098	0.452	FN565098.1	Porites lobata	Porites lobata genomic DNA containing 18S rRNA gene, ITS1, 5.8S rRNA gene, ITS2 and 28S rRNA gene, isolate F17-05	DNA	Wed Apr 21 00:00:00 EDT 2010	TCAGCGGGTAGCCTTGCCTGATCTGAGGTCAAGATTTGATGTTGTCATTGTCTGTCACCGCTTTGATTGGATTTTGTTTCTGCTATTGCATGTTTGGGCGAAGGAAAATATTATCTTTAGCCTTCGCACTCAAGTTTCAATAGAGAATGCGAGTCCAATGCTGCTGTCCTTCAAGGGACACGGCGATTTCATGCTTGCTTGCTAACACGCCGTGACACCTCAATACCGCACTCACGAGTGCGTTCGATAAAATCCGACACTCAGACAGACATGCTCCTGGGAGAACCCAAGAGCGCCATTTGCGTTCAAAGATTCAATGATTCACTGAATTCTGCAATTCACACTACATATCGCAGCTGGCTGCGTTCTTCATCGATACGTGAGCCAAGAGATCCACCG…	655	Eukaryota; Metazoa; Cnidaria; Anthozoa; Hexacorallia; Scleractinia; Fungiina; Poritidae; Porites		American Samoa:Ofu Island	taxon:104759	F17-05
FN565101	0.45	FN565101.1	Porites lobata	Porites lobata genomic DNA containing 18S rRNA gene, ITS1, 5.8S rRNA gene, ITS2 and 28S rRNA gene, isolate F18-05	DNA	Wed Apr 21 00:00:00 EDT 2010	TCAGCGGGTAGCCTTGCCTGATCTGAGGTCAAGATTTGATGTTTATTGTCTGTCACCGCTTTGATTGGACTTTGTTTCTGCTATTGCATGTTTGGGCGAAGGAAAATATTATCTTTAGCCTTCGCACTCAAGTTTCAATAGAGAATGCGAGTCCAATGCTGCTGTCCTTCAAGGGACACGGCGATTTAATGCTTGCTTGCTAACACGCCGTGACACCTCAATACCGCACTCACGAGTGCGTTCGATAAAATCCGACACTCAGACAGACATGCTCCTGGGAGAACCCAAGAGCGCCATTTGCGTTCAAAGATTCAATGATTCACTGAATTCTGCAATTCACACTACATATCGCAGCTGGCTGCGTTCTTCATCGATACGTGAGCCAAGAGATCCACCGTC…	645	Eukaryota; Metazoa; Cnidaria; Anthozoa; Hexacorallia; Scleractinia; Fungiina; Poritidae; Porites		American Samoa:Ofu Island	taxon:104759	F18-05
FN565109	0.447	FN565109.1	Porites lobata	Porites lobata genomic DNA containing 18S rRNA gene, ITS1, 5.8S rRNA gene, ITS2 and 28S rRNA gene, isolate F19-07	DNA	Wed Apr 21 00:00:00 EDT 2010	TCAGCGGGTAGCCTTGCCTGATCTGAGGTCAAGATTTGATGTTTATTGTCACTCACCGCTTTGATTGGATTTTGTTTCTGCTATTGCATGTTTGGGCGAAGGAAAATATTATCTTTAGCCTTCGCACTCAAGTTTCAATAGAGAATGCGAGTCCAATGCTGCTGTCCTTCAAGGGACACGGCGATTTAATGCTTGCTTGCTAACACGCCGTGACACCTCAATACCGCACTCACGAGTGCGTTCGATAAAATCCGACACTCAGACAGACATGCTCCTGGGAGAACCCAAGAGCGCCATTTGCGTTCAAAGATTCAATGATTCACTGAATTCTGCAATTCACACTACATATCGCAGCTGGCTGCGTTCTTCATCGATACGTGAGCCAAGAGATCCACCGTC…	649	Eukaryota; Metazoa; Cnidaria; Anthozoa; Hexacorallia; Scleractinia; Fungiina; Poritidae; Porites		American Samoa:Ofu Island	taxon:104759	F19-07
FN565110	0.448	FN565110.1	Porites lobata	Porites lobata genomic DNA containing 18S rRNA gene, ITS1, 5.8S rRNA gene, ITS2 and 28S rRNA gene, isolate F19-08	DNA	Wed Apr 21 00:00:00 EDT 2010	TCAGCGGGTAGCCTTGCCTGATCTGAGGTCAAGATTTGATGTTTATTGTCTGTCACCGCTTTGATTGGATTTTGTTTCTGCTATTGCATGTTTGGGCGAAGGAAAATATTATCTTTAGCCTTCGCACTCAAGTTTCAATAGAGAATGCGAGTCCAATGCTGCTGTCCTTCAAGGGACACGGCGATTTAATGCTTGCTTGCTAACACGCCGTGACACCTCAATACCGCACTCACGAGTGCGTTCGATAAAATCCGACACTCAGACAGACATGCTCCTGGGAGAACCCAAGAGCGCCATTTGCGTTCAAAGATTCAATGATTCACTGAATTCTGCAATTCACACTACATATCGCAGCTGGCTGCGTTCTTCATCGATACGTGAGCCAAGAGATCCACCGTC…	645	Eukaryota; Metazoa; Cnidaria; Anthozoa; Hexacorallia; Scleractinia; Fungiina; Poritidae; Porites		American Samoa:Ofu Island	taxon:104759	F19-08
JN583881	0.445	JN583881.1	Porites lobata	Porites lobata strain PL-1 18S ribosomal RNA gene, partial sequence; internal transcribed spacer 1, 5.8S ribosomal RNA gene, and internal transcribed spacer 2, complete sequence; and 28S ribosomal RNA gene, partial sequence	DNA	Sat Aug 31 00:00:00 EDT 2013	ACAGAGCGGCGGATGCCGGGAAGTTGGTCAAACTTGATCATTTAGAGGAAGTAAAAGTCGTAACAAGGTTTCCGTAGGTGAACCTGCGGAAGGATCATTACCGATGTGAAAAATCCAAGGTTAAACATCATTAACCAACCAGTGTGAACTGTGAAACAACTCTTTAGGGGTCGACACAGGCGTGTGTCGTTAAATGGCGGATAGGTTCCTTCCGCCAGCCCCGCCATTGTGTTTATGATATCACTTTGAACGTTAAAGACTGAGAACTATGTATCATGCATTAAATGTATGAGAAAGAAGGAAAGAAAAATGAGAGACAACTTTTGACGGTGGATCTCTTGGCTCACGTATCGATGAAGAACGCAGCCAGCTGCGATATGTAGTGTGAATTGCAGAATT…	658	Eukaryota; Metazoa; Cnidaria; Anthozoa; Hexacorallia; Scleractinia; Fungiina; Poritidae; Porites		Iran: Persian Gulf	taxon:104759			PL-1
JN583882	0.45	JN583882.1	Porites lobata	Porites lobata strain PL-2 18S ribosomal RNA gene, partial sequence; internal transcribed spacer 1, 5.8S ribosomal RNA gene, and internal transcribed spacer 2, complete sequence; and 28S ribosomal RNA gene, partial sequence	DNA	Sat Aug 31 00:00:00 EDT 2013	ACAGAGCGGCGGATGCCGGGAAGTAGGTCAATCTTGATCATTTAGAGGAAGTAAAAGTCGTAACAAGGTTTCCGTAGGTGAACCTGCGGAAGGATCATTCCCGATGTGAAAAATCCAAGGTTAAACATCATTAACCAACCAGTGTGAACTGTGAAACAACTCTTTAGGGGTCGACACAGGCGTGTGTCGTTAAATGGCGGATAGGTTCCTTCCGCCAGCCCCGCCATTGTGTTTATGATATCACTTTGAACGTTAAAGACTGAGAACTATGTATCATGCATTAAATGTATGAGAAAGAAGGAAAGAAAAATGAGAGACAACTTTTGACGGTGGATCTCTTGGCTCACGTATCGATGAAGAACGCAGCCAGCTGCGATATGTAGTGTGAATTGCAGAATT…	658	Eukaryota; Metazoa; Cnidaria; Anthozoa; Hexacorallia; Scleractinia; Fungiina; Poritidae; Porites		Iran: Persian Gulf	taxon:104759			PL-2
JN583883	0.45	JN583883.1	Porites lobata	Porites lobata strain PL-3 18S ribosomal RNA gene, partial sequence; internal transcribed spacer 1, 5.8S ribosomal RNA gene, and internal transcribed spacer 2, complete sequence; and 28S ribosomal RNA gene, partial sequence	DNA	Sat Aug 31 00:00:00 EDT 2013	ACAGAGCGGCGGATGCCGGGAAGTTGGTCAAACTTGATCATTTAGAGGAAGTAAAAGTCGTAACAAGGTTTCCGTAGGTGAACCTGCGGAAGGATCATTACCGATGTGAAAAATCCAAGGTTAAACATCATTAACCAACCAGTGTGAACTGTGAAACAACTCTTTAGGGGTCGACACAGGCGTGTGTCGTTAAATGGCGGATAGGTTCCTTCCGCCAGCCCCGCCATTGTGTTTATGATATCACTTTGAACGTTAAAGACTGAGAACTATGTATCATGCATTAAATGTATGAGAAAGAAGGAAAGAAAAATGAGAGACAACTTTTGACGGTGGATCTCTTGGCTCACGTATCGATGAAGAACGCAGCCAGCTGCGATATGTAGTGTGAATTGCAGAATT…	658	Eukaryota; Metazoa; Cnidaria; Anthozoa; Hexacorallia; Scleractinia; Fungiina; Poritidae; Porites		Iran: Persian Gulf	taxon:104759			PL-3
JN583884	0.448	JN583884.1	Porites lobata	Porites lobata strain PL-4 18S ribosomal RNA gene, partial sequence; internal transcribed spacer 1, 5.8S ribosomal RNA gene, and internal transcribed spacer 2, complete sequence; and 28S ribosomal RNA gene, partial sequence	DNA	Sat Aug 31 00:00:00 EDT 2013	ACAGAGCGGCGGATGCCGGGAAGTTGGTCAAACTTGATCATTTAGAGGAAGTAAAAGTCGTAACAAGGTTTCCGTAGGTGAACCTGCGGAAGGATCATTACCGATGTGAAAAATCCAAGGTTAAACATCATTAACCAACCAGTGTGAACTGTGAAACAACTCTTTAGGGGTCGACACAGGCGTGTGTCGTTAAATGGCGGATAGGTTCCTTCCGCCAGCCCCGCCATTGTGTTTATGATATCACTTTGAACGTTAAAGACTGAGAACTATGTATCATGCATTAAATGTATGAGAAAGAAGGAAAGAAAAATGAGAGACAACTTTTGACGGTGGATCTCTTGGCTCACGTATCGATGAAGAACGCAGCCAGCTGCGATATGTAGTGTGAATTGCAGAATT…	658	Eukaryota; Metazoa; Cnidaria; Anthozoa; Hexacorallia; Scleractinia; Fungiina; Poritidae; Porites		Iran: Persian Gulf	taxon:104759			PL-4
JQ911580	0.471	JQ911580.1	Porites pukoensis	Porites pukoensis isolate 2 18S ribosomal RNA gene, partial sequence; internal transcribed spacer 1, 5.8S ribosomal RNA gene, and internal transcribed spacer 2, complete sequence; and 28S ribosomal RNA gene, partial sequence	DNA	Sat Jul 21 00:00:00 EDT 2012	ATTGATGCGTTTAGTGAGGCCTTCTGACTGGCGCCGCTACTCTGGCAACAGAGCGGCGGATGCCGGGAAGTTGGTCAAACTTGATCATTTAGAGGAAGTAAAAGTCGTAACAAGGTTTCCGTAGGTGAACCTGCGGAAGGATCATTACCGATGTGAAAGAATCCAAGGTTAAACATCATTAACCAGGGTGAACGGTGAAACACCTCTTTAGGGGTCGGCACAGGCGTGGGTCGTTAAAGGGCGAATAGGTTCCTTCCGCCAGCCCCGCCATTGGGTTTATGATATCACTTTGAACGTTAAAGACTGAAAACGTATGTATCAGGCTTTAAAGGTATGAGAAAAAAGGAAAAAAAAATGAAAGACAACTTTTGACGGTGGATCTCTGGGTTCACGTATCGA…	991	Eukaryota; Metazoa; Cnidaria; Anthozoa; Hexacorallia; Scleractinia; Fungiina; Poritidae; Porites		China: Xvwen, Zhanjiang	taxon:627025	2			mage v. 5.0	Sanger dideoxy sequencing
JQ911582	0.467	JQ911582.1	Porites lutea	Porites lutea isolate 11 18S ribosomal RNA gene, partial sequence; internal transcribed spacer 1, 5.8S ribosomal RNA gene, and internal transcribed spacer 2, complete sequence; and 28S ribosomal RNA gene, partial sequence	DNA	Sat Jul 21 00:00:00 EDT 2012	GATGGTTTAGTGAGGCCTTCTGACTGGCGCCGCTACTCTGGCAACAGAGCGGCGGATGCCGGGAAGTTGGTCAAACTTGATCATTTAGAGGAAGTAAAAGTCGTAACAAGGTTTCCGTAGGTGAACCTGCGGAAGGATCATTACCGATGTGAAAGAATCCAAGGTTAAACATCATTAACCAGGGTGAACTGTGAAACACCTCTTTAGGGGTCGGCACAGGCGTGGGTCGTTAAATGGCGAATAGGTTCCTTCCGCCAGCCCCGCCATTGTGTTTATGATATCACTTTGAACGTTAAAAACTGAGAACGTATGTATCATGCATTAAAGGTATGAAAAAGAAGGAAAGAAAAATGAAAGACAACTTTTGACGGTGGATCTCTTGGCTCACGTATCGATGAA…	998	Eukaryota; Metazoa; Cnidaria; Anthozoa; Hexacorallia; Scleractinia; Fungiina; Poritidae; Porites		China: Xvwen, Zhanjiang	taxon:51062	11			mage v. 5.0	Sanger dideoxy sequencing
JQ911583	0.481	JQ911583.1	Porites lutea	Porites lutea isolate 10 18S ribosomal RNA gene, partial sequence; internal transcribed spacer 1, 5.8S ribosomal RNA gene, and internal transcribed spacer 2, complete sequence; and 28S ribosomal RNA gene, partial sequence	DNA	Sat Jul 21 00:00:00 EDT 2012	AGAAGACGGATAGACGACCTACCCGAGCCCTTCTGACTGGCGCCGCTACTCTGGCAACAGAGCGGCGGATGCCGGGAAGTTGGTCAAACTTGATCATTTAGAGGAAGTAAAAGTCGTAACAAGGTTTCCGTAGGTGAACCTGCGGAAGGATCATTACCGATGTGAAAAATCCAAGGTTAAACATCATTAACCAGTGTGAACTGTGAAACAACTCTTTAGGGGTCGGCACAGGCGTGTGTCGTTAAATGGCGGATAGGTTCCTTCCGCCAGCCCCGCCATTGTGTTTATGATATCACTTTGAACGTTAAAGACTGAGAACGTATGTATCATGCATTAAATGTATGAAAAAGAAGGAAAGAAAAATGAGAGACAACTTTTGACGGTGGATCTCTTGGCTCA…	1176	Eukaryota; Metazoa; Cnidaria; Anthozoa; Hexacorallia; Scleractinia; Fungiina; Poritidae; Porites		China: Xvwen, Zhanjiang	taxon:51062	10			mage v. 5.0	Sanger dideoxy sequencing
JQ911584	0.482	JQ911584.1	Porites lutea	Porites lutea isolate 3 18S ribosomal RNA gene, partial sequence; internal transcribed spacer 1, 5.8S ribosomal RNA gene, and internal transcribed spacer 2, complete sequence; and 28S ribosomal RNA gene, partial sequence	DNA	Sat Jul 21 00:00:00 EDT 2012	CCCGCATTGATGGCTTAGTGAGGCCTTCTGACTGGCGCCGCTACTCTGGCAACAGAGCGGCGGATGCCGGGAAGTTGGTCAAACTTGATCATTTAGAGGAAGTAAAAGTCGTAACAAGGTTTCCGTAGGTGAACCTGCGGAAGGATCATTACCGATGTGAAAAATCCAAGGTTAAACATCATTAACCAGTGTGAACTGTGAAACAACTCTTTAGGGGTCGGCACAGGCGTGTGTCGTTAAATGGCGGATAGGTTCCTTCCGCCAGCCCCGCCATTGTGTTTATTATATCACTTTGAACGTTAAAGACTGAAAACTATGTATCATGCATTAAATGTATGAGAAAGAAGGAAAGAAAAATGAGAGACAACTTTTGACGGTGGATCTCTTGGCTCACGTATC…	1102	Eukaryota; Metazoa; Cnidaria; Anthozoa; Hexacorallia; Scleractinia; Fungiina; Poritidae; Porites		China: Xvwen, Zhanjiang	taxon:51062	3			mage v. 5.0	Sanger dideoxy sequencing
JQ911587	0.475	JQ911587.1	Porites lutea	Porites lutea isolate 6 18S ribosomal RNA gene, partial sequence; internal transcribed spacer 1, 5.8S ribosomal RNA gene, and internal transcribed spacer 2, complete sequence; and 28S ribosomal RNA gene, partial sequence	DNA	Sat Jul 21 00:00:00 EDT 2012	AAAAACCGGAATTTGTATGGGTTTAGTGAGGCCTTCTGACTGGCGCCGCTACTCTGGCAACAGAGCGGCGGATGCCGGGAAGTTGGTCAAACTTGATCATTTAGAGGAAGTAAAAGTCGTAACAAGGTTTCCGTAGGTGAACCTGCGGAAGGATCATTACCGATGTGAAAGAATCCAAGGTTAAACATCATTAACCAGTGTGAACTGTACAACAACTCTTTAGGGGTCGGCACAGGCGTGTGTCGTTAAATGGCGGATAGGTTCCTTCCGCCAGCCCCGCCATTGTGTTTATGATATCACTTTGAACGTTTAAGACTGAGAACGTATGTATCATGCATTAAATGTATGAGAAAGAAGGAAAGAAAAATGAGAGACAACTTTTGACGGTGGATCTCTTGG…	1060	Eukaryota; Metazoa; Cnidaria; Anthozoa; Hexacorallia; Scleractinia; Fungiina; Poritidae; Porites		China: Xvwen, Zhanjiang	taxon:51062	6			mage v. 5.0	Sanger dideoxy sequencing
JQ911588	0.484	JQ911588.1	Porites lutea	Porites lutea isolate 7 18S ribosomal RNA gene, partial sequence; internal transcribed spacer 1, 5.8S ribosomal RNA gene, and internal transcribed spacer 2, complete sequence; and 28S ribosomal RNA gene, partial sequence	DNA	Sat Jul 21 00:00:00 EDT 2012	CAAATTCCCCATTGAATGGTTTAGTGAGGCCTTCTGACTGGCGCCGCTACTCTGGCAACAGAGCGGCGGATGCCGGGAAGTTGGTCAAACTTGATCATTTAGAGGAAGTAAAAGTCGTAACAAGGTTTCCGTAGGTGAACCTGCGGAAGGATCATTACCGATGTGAAAAATCCAAGGTTAAACATCATTAACCAGTGTGAACTGTGAAACAACTCTTTAGGGGTCGGCACAGGCGTGTGTCGTTAAATGGCGGATAGGTTCCTTCCGCCAGCCCCGCCATTGTGTTTATGATATCACTTTGAACGTTAAAGACTGAGAACGTATGTATCATGCATTAAATGTATGAGAAAGAAGGAAAGAAAAATGAGAGACAACTTTTGACGGTGGATCTCTTGGCTC…	1233	Eukaryota; Metazoa; Cnidaria; Anthozoa; Hexacorallia; Scleractinia; Fungiina; Poritidae; Porites		China: Xvwen, Zhanjiang	taxon:51062	7			mage v. 5.0	Sanger dideoxy sequencing
JQ911589	0.468	JQ911589.1	Porites lutea	Porites lutea isolate 8 18S ribosomal RNA gene, partial sequence; internal transcribed spacer 1, 5.8S ribosomal RNA gene, and internal transcribed spacer 2, complete sequence; and 28S ribosomal RNA gene, partial sequence	DNA	Sat Jul 21 00:00:00 EDT 2012	TTGATGGCTTAGTGAGGCCTTCTGACTGGCGCCGCTACTCTGGCAACAGAGCGGCGGATGCCGGGAAGTTGGTCAAACTTGATCATTTAGAGGAAGTAAAAGTCGTAACAAGGTTTCCGTAGGTGAACCTGCGGAAGGATCATTACCGATGTGAAAAATCCAAGGATAAACATCATTAACCAGTGTGAACTGTGAAACAACTCTTTAGGGGTCGGCACAGGCGTGTGTCGTTAAATGGCGGATAGGTTCCTTCCGCCAGCCCCGCCATTGTGTTTATTATATCACTTTGAACGTTAAAGACTGAAAACTATGTATCATGCATTAAATGTATGAGAAAGAAGGAAAGAAAAATGAGAGACAACTTTTGACGGTGGATCTCTTGGCTCACGTATCGATGAA…	1008	Eukaryota; Metazoa; Cnidaria; Anthozoa; Hexacorallia; Scleractinia; Fungiina; Poritidae; Porites		China: Xvwen, Zhanjiang	taxon:51062	8			mage v. 5.0	Sanger dideoxy sequencing
LT558169	0.447	LT558169.1	Porites compressa	Porites compressa genomic DNA sequence contains 18S rRNA gene, ITS1, 5.8S rRNA gene, ITS2, 28S rRNA gene, strain HM70, clone 4	DNA	Sun Jun 05 00:00:00 EDT 2016	GGTGAACCTGCGGAAGGATCATTACCGATGTGAAAAAATCCAAGGTTAAACATCATTAACCAACCAGTGTGAACTGTGAAACAACTCTTTAGGGGTCGGCACAGGCGTGTGTCGTTAAATGGCGGATAGGTTCCTTCCGCCAGCCCCGCCATTGTGTTTATTATATCACTTTGAACGTTAAAGACTGAGAACTATGTATCATGCATTAAATGTATGAGACAGAAGGAAAGAAAAATGAGAGACAACTTTTGACGGTGGATCTCTTGGCTCACGTATCGATGAAGAACGCAGCCAGCTGCGATATGTAGTGTGAATTGCAGAATTCAGTGAATCATTGAATCTTTGAACGCAAATGGCGCTCTTGGGTTCTCCCAGGAGCATATCTGTCTGAGTGTCGGA…	649	Eukaryota; Metazoa; Cnidaria; Anthozoa; Hexacorallia; Scleractinia; Fungiina; Poritidae; Porites	4	USA:Maui	taxon:46720			HM70
LT558220	0.45	LT558220.1	Porites lobata	Porites lobata genomic DNA sequence contains 18S rRNA gene, ITS1, 5.8S rRNA gene, ITS2, 28S rRNA gene, strain 1057, clone 8	DNA	Sun Jun 05 00:00:00 EDT 2016	GGTGAACCTGCGGAAGGATCATTACCGATGTGAAAGAATCCAAGGTTAAACATCATTAACCAGTGTGAACTGTGAAACAACTCTTTAGGGGTCGGCACAGGCGTGTGTCGTTAAATGGCGGATAGGTTCCTTCCGCCAGCCCCGCCATTGTGTTTATGATATCACTTTGAACGTTAAAGACTGAGAACGTATGTATCATGCATTAAATGTATGAGAAAGAAGGAAAGAAAAATGAGAGACAACTTTTGACGGTGGATCTCTTGGCTCACGTATCGATGAAGAACGCAGCCAGCTGCGATATGTAGTGTGAATTGCAGAATTCAGTGAATCATTGAATCTTTGAACGCAAATGGCGCTCTTGGGTTCTCCCAGGAGCATGTCTGTCTGAGTGTCGGATTT…	646	Eukaryota; Metazoa; Cnidaria; Anthozoa; Hexacorallia; Scleractinia; Fungiina; Poritidae; Porites	8	Ecuador:Galapagos	taxon:104759			1057
MK881179	0.444	MK881179.1	Porites lobata	Porites lobata voucher SA0054a small subunit ribosomal RNA gene, partial sequence; internal transcribed spacer 1, 5.8S ribosomal RNA gene, and internal transcribed spacer 2, complete sequence; and large subunit ribosomal RNA gene, partial sequence	DNA	Fri May 01 00:00:00 EDT 2020	AGGTTTCCGTAGGTGAACCTGCGGAAGGATCATTACCGATGTGAAAAATCCAAGGTTAAACATCATTAACCAGTGTGAACTGTACAACAACTCTTTAGGGGTCGGCACAGGCGTGTGTCGTTAAATGGCGGATAGGTTCCTTCCGCCAGCCCCGCCATTGTGTTTATGATATCACTTTGAACGTTAAAGACTGAGAACGTATGTATCATGCATTAAATGTATGAGAAAGAAGGAAAGAAAAATGAGAGACAACTTTTGACGGTGGATCTCTTGGCTCACGTATCGATGAAGAACGCAGCCAGCTGCGATATGTAGTGTGAATTGCAGAATTCAGTGAATCATTGAATCTTTGAACGCAAATGGCGCTCTTGGGTTCTCCCAGGAGCATGTCTGTCTGAG…	666	Eukaryota; Metazoa; Cnidaria; Anthozoa; Hexacorallia; Scleractinia; Fungiina; Poritidae; Porites		Red Sea	taxon:104759		SA0054a			Sanger dideoxy sequencing
MK881180	0.445	MK881180.1	Porites lobata	Porites lobata voucher SA0054b small subunit ribosomal RNA gene, partial sequence; internal transcribed spacer 1, 5.8S ribosomal RNA gene, and internal transcribed spacer 2, complete sequence; and large subunit ribosomal RNA gene, partial sequence	DNA	Fri May 01 00:00:00 EDT 2020	AGGTTTCCGTAGGTGAACCTGCGGAAGGATCATTACCGATGTGAAAAATCCAAGGTTAAACATCATTAACCAACCAGTGTGAACTGTGAAACAACTCTTTAGGGGTCGGCACAGGCGTGTGTCGTTAAATGGCGGATAGGTTCCTTCCGCCAGCCCCGCCATTGTGTTTATTATATCACTTTGAACGTTAAAGACTGAGAACGTATGTATCATGCATAAAATGTATGAGAAAGAAGGAAAGAAAAATGAGAGACAACTTTTGACGGTGGATCTCTTGGCTCACGTATCGATGAAGAACGCAGCCAGCTGCGATATGTAGTGTGAATTGCAGAATTCAGTGAATCATTGAATCTTTGAACGCAAATGGCGCTCTTGGGTTCTCCCAGGAGCATGTCTGTC…	670	Eukaryota; Metazoa; Cnidaria; Anthozoa; Hexacorallia; Scleractinia; Fungiina; Poritidae; Porites		Red Sea	taxon:104759		SA0054b			Sanger dideoxy sequencing
MK881184	0.441	MK881184.1	Porites echinulata	Porites echinulata voucher SA0091a small subunit ribosomal RNA gene, partial sequence; internal transcribed spacer 1, 5.8S ribosomal RNA gene, and internal transcribed spacer 2, complete sequence; and large subunit ribosomal RNA gene, partial sequence	DNA	Fri May 01 00:00:00 EDT 2020	AGGTTTCCGTAGGTGAACGTGCGGAAGGATCATTACCGATGTGAAAAAATCCAAGGTTAAACATCATTAACCAACCAGTGTGAACTGTGAAACAACTCTTTAGGGGTCGGCACAGGCGTGTGTCGTTAAATGGCGGATAGGTTCCTTCCGCCAGCCCCGCCATTGTGTTTATGATATCACTTTGAACGTTTAAGACTGAGAACGTATGTATCATGCATTAAATGTATGAGAAAGAAGGAAAGAAAAATGAGAGACAACTTTTGACGGTGGATCTCTTGGCTCACGTATCGATGAAGAACGCAGCCAGCTGCGATATGTAGTGTGAATTGCAGAATTCAGTGAATCATTGAATCTTTGAACGCAAATGGCGCTCTTGGGTTCTCCCAGGAGCATGTCTGT…	671	Eukaryota; Metazoa; Cnidaria; Anthozoa; Hexacorallia; Scleractinia; Fungiina; Poritidae; Porites		Red Sea	taxon:627003		SA0091a			Sanger dideoxy sequencing
MK881185	0.444	MK881185.1	Porites echinulata	Porites echinulata voucher SA0091b small subunit ribosomal RNA gene, partial sequence; internal transcribed spacer 1, 5.8S ribosomal RNA gene, and internal transcribed spacer 2, complete sequence; and large subunit ribosomal RNA gene, partial sequence	DNA	Fri May 01 00:00:00 EDT 2020	AGGTTTCCGTAGGTGAACGTGCGGAAGGATCATTACCGATGTGAAAAAATCCAAGGTTAAACATCATTAACCAACCAGTGTGAACTGTGAAACAACTCTTTAGGGGTCGGCACAGGCGTGTGTCGTTAAATGGCGGATAGGTTCCTTCCGCCAGCCCCGCCATTGTGTTTATGATATCCCTTTGAACGTTTAAGACTGAGAACGTATGTATCATGCATTAAATGTATGAGAAAGAAGGAAAGAAAAATGAGAGACAACTTTTGACGGTGGATCTCTTGGCTCACGTATCGATGAAGAACGCAGCCAGCTGCGATATGTAGTGTGAATTGCAGAATTCAGTGAATCATTGAATCTTTGAACGCAAATGGCGCTCTTGGGTTCTCCCAGGAGCATGTCTGT…	671	Eukaryota; Metazoa; Cnidaria; Anthozoa; Hexacorallia; Scleractinia; Fungiina; Poritidae; Porites		Red Sea	taxon:627003		SA0091b			Sanger dideoxy sequencing
MK881187	0.446	MK881187.1	Porites solida	Porites solida voucher SA0149a small subunit ribosomal RNA gene, partial sequence; internal transcribed spacer 1, 5.8S ribosomal RNA gene, and internal transcribed spacer 2, complete sequence; and large subunit ribosomal RNA gene, partial sequence	DNA	Fri May 01 00:00:00 EDT 2020	AGGTTTCCGTAGGTGAACCTGCGGAAGGATCATTACCGATGTGAAAAAATCCAAGGTTAAACATCATTAACCAACCAGTGTGAACTGTGAAACAACTCTTTAGGGGTCGGCACAGGCGTGTGTCGTTAAATGGCGGATAGGTTCCTTCCGCCAGCCCCGCCATTGTGTTTATGATATCACTTTGAACGTTTAAGACTGAGAACGTATGTATCATGCATTAAATGTATGAGAAAGAAGGAAAGAAAAATGAGAGACAACTTTTGACGGTGGATCTCTTGGCTCACGTATCGATGAAGAACGCAGCCAGCTGCGATATGTAGTGTGAATTGCAGAATTCAGTGAATCATTGAATCTTTGAACGCAAATGGCGCTCTTGGGTTCTCCCAGGAGCATGTCTGT…	671	Eukaryota; Metazoa; Cnidaria; Anthozoa; Hexacorallia; Scleractinia; Fungiina; Poritidae; Porites		Red Sea	taxon:627028		SA0149a			Sanger dideoxy sequencing
MK881188	0.443	MK881188.1	Porites solida	Porites solida voucher SA0149b small subunit ribosomal RNA gene, partial sequence; internal transcribed spacer 1, 5.8S ribosomal RNA gene, and internal transcribed spacer 2, complete sequence; and large subunit ribosomal RNA gene, partial sequence	DNA	Fri May 01 00:00:00 EDT 2020	AGGTTTCCGTAGGTGAACCTGCGGAAGGATCATTACCGATGTGAAAAAATCCAAGGTTAAACATCATTAACCAACCAGTGTGAACTGTGAAACAACTCTTTAGGGGTCGGCACAGGCGTGTGTCGTTAAATGGCGGATAGGTTCCTTCCGCCAGCCCCGCCATTGTGTTTATGATATCACTTTGAACGTTTAAGACTGAGAACGTATGTATCATGCATTAAATGTATGAGAAAGAAGGAAAGAAAAATGAGAGACAACTTTTGACGGTGGATCTCTTGGCTCACGTATCGATGAAGAACGCAGCCAGCTGCGATATGTAGTGTGAATTGCAGAATTCAGTGAATCATTGAATCTTTGAACGCAAATGGCGCTCTTGGGTTCTCCCAGGAGCATGTCTGT…	671	Eukaryota; Metazoa; Cnidaria; Anthozoa; Hexacorallia; Scleractinia; Fungiina; Poritidae; Porites		Red Sea	taxon:627028		SA0149b			Sanger dideoxy sequencing
MK881195	0.445	MK881195.1	Porites lutea	Porites lutea voucher SA0268a small subunit ribosomal RNA gene, partial sequence; internal transcribed spacer 1, 5.8S ribosomal RNA gene, and internal transcribed spacer 2, complete sequence; and large subunit ribosomal RNA gene, partial sequence	DNA	Fri May 01 00:00:00 EDT 2020	AGGTTTCCGTAGGTGAACCTGCGGAAGGATCATTACCGATGTGAAAAAATCCAAGGTTAAACATCATTAACCAGTGTGAACTGTGAAACAACTCTTTAGGGGTCGGCACAGGCGTGTGTCGTTAAATGGCGGATAGGTTCCTTCCGCCAGCCCCGCCATTGTGTTTATGATATCACTTTGAACGTTAAAGACTGAGAACGTATGTATCATGCATGAAATGTATGAGAAAGAAGGAAAGAAAAATGAGAGACAACTTTTGACGGTGGATCTCTTGGCTCACGTATCGATGAAGAACGCAGCCAGCTGCGATATGTAGTGTGAATTGCAGAATTCAGTGAATCATTGAATCTTTGAACGCAAATGGCGCTCTTGGGTTCTCCCAGGAGCATGTCTGTCTGA…	667	Eukaryota; Metazoa; Cnidaria; Anthozoa; Hexacorallia; Scleractinia; Fungiina; Poritidae; Porites		Red Sea	taxon:51062		SA0268a			Sanger dideoxy sequencing
MK881196	0.446	MK881196.1	Porites lutea	Porites lutea voucher SA0268b small subunit ribosomal RNA gene, partial sequence; internal transcribed spacer 1, 5.8S ribosomal RNA gene, and internal transcribed spacer 2, complete sequence; and large subunit ribosomal RNA gene, partial sequence	DNA	Fri May 01 00:00:00 EDT 2020	AGGTTTCCGTAGGTGAACCTGCGGAAGGATCATTACCGATGTGAAAAATCCAAGGTTAAACATCATTAACCAACCAGTGTGAACTGTGAAACAACTCTTTAGGGGTCGGCACAGGCGTGTGTCGTTAAATGGCGGATAGGTTCCTTCCGCCAGCCCCGCCATTGTGTTTATGATATCACTTTGAACGTTAAAGACTGAGAACGTATGTATCATGCATGAAATGTATGAGAAAGAAGGAAAGAAAAATGAGAGACAACTTTTGACGGTGGATCTCTTGGCTCACGTATCGATGAAGAACGCAGCCAGCTGCGATATGTAGTGTGAATTGCAGAATTCAGTGAATCATTGAATCTTTGAACGCAAATGGCGCTCTTGGGTTCTCCCAGGAGCATGTCTGTC…	670	Eukaryota; Metazoa; Cnidaria; Anthozoa; Hexacorallia; Scleractinia; Fungiina; Poritidae; Porites		Red Sea	taxon:51062		SA0268b			Sanger dideoxy sequencing
MK881197	0.444	MK881197.1	Porites lutea	Porites lutea voucher SA0307a small subunit ribosomal RNA gene, partial sequence; internal transcribed spacer 1, 5.8S ribosomal RNA gene, and internal transcribed spacer 2, complete sequence; and large subunit ribosomal RNA gene, partial sequence	DNA	Fri May 01 00:00:00 EDT 2020	AGGTTTCCGTAGGTGAACCTGCGGAAGGATCATTACCGATGTGAAAAAATCCAAGGTTAAACATCATTAACCAGTGTGAACTGTGAAACAACTCTTTAGGGGTCGGCACAGGCGTGTGTCGTTAAATGGCGGATAGGTTCCTTCCGCCAGCCCCGCCATTGTGTTTATGATATCACTTTGAACGTTAAAGACTGAGAACGTATGTATCATGCATTAAATGTATGAGAAAGAAGGAAAGAAAAATGAGAGACAACTTTTGACGGTGGATCTCTTGGCTCACGTATCGATGAAGAACGCAGCCAGCTGCGATATGTAGTGTGAATTGCAGAATTCAGTGAATCATTGAATCTTTGAACGCAAATGGCGCTCTTGGGTTCTCCCAGGAGCATGTCTGTCTGA…	671	Eukaryota; Metazoa; Cnidaria; Anthozoa; Hexacorallia; Scleractinia; Fungiina; Poritidae; Porites		Red Sea	taxon:51062		SA0307a			Sanger dideoxy sequencing
MK881198	0.444	MK881198.1	Porites lutea	Porites lutea voucher SA0307b small subunit ribosomal RNA gene, partial sequence; internal transcribed spacer 1, 5.8S ribosomal RNA gene, and internal transcribed spacer 2, complete sequence; and large subunit ribosomal RNA gene, partial sequence	DNA	Fri May 01 00:00:00 EDT 2020	AGGTTTCCGTAGGTGAACCTGCGGAAGGATCATTACCGATGTGAAAAAATCCAAGGTTAAACATCATTAACCAGTGTGAACTGTGAAACAACTCTTTAGGGGTCGGCACAGGCGTGTGTCGTTAAATGGCGGATAGGTTCCTTCCGCCAGCCCCGCCATTGTGTTAATGATATCACTTTGAACGTTAAAGACTGAGAACGTATGTATCATGCATTAAATGTATGAGAAAGAAGGAAAGAAAAATGAGAGACAACTTTTGACGGTGGATCTCTTGGCTCACGTATCGATGAAGAACGCAGCCAGCTGCGATATGTAGTGTGAATTGCAGAATTCAGTGAATCATTGAATCTTTGAACGCAAATGGCGCTCTTGGGTTCTCCCAGGAGCATGTCTGTCTGA…	671	Eukaryota; Metazoa; Cnidaria; Anthozoa; Hexacorallia; Scleractinia; Fungiina; Poritidae; Porites		Red Sea	taxon:51062		SA0307b			Sanger dideoxy sequencing
MK881203	0.445	MK881203.1	Porites lutea	Porites lutea voucher SA0340a small subunit ribosomal RNA gene, partial sequence; internal transcribed spacer 1, 5.8S ribosomal RNA gene, and internal transcribed spacer 2, complete sequence; and large subunit ribosomal RNA gene, partial sequence	DNA	Fri May 01 00:00:00 EDT 2020	AGGTTTCCGTAGGTGAACCTGCGGAAGGATCATTACCGATGTGAAAAATCCAAGGTTAAACATCATTAACCAACCAGTGTGAACTGTGAAACAACTCTTTAGGGGTCGGCACAGGCGTGTGTCGTTAAATGGCGGATAGGTTCCTTCCGCCAGCCCCGCCATTGTGTTTATGATATCACTTTGAACGTTAAAGACTGAGAACTATGTATCATGCATTAAATGTATGAGAAAGAAGGAAAGAAAAATGAGAGACAACTTTTGACGGTGGATCTCTTGGCTCACGTATCGATGAAGAACGCAGCCAGCTGCGATATGTAGTGTGAATTGCAGAATTCAGTGAATCATTGAATCTTTGAACGCAAATGGCGCTCTTGGGTTCTCCCAGGAGCATGTCTGTCT…	669	Eukaryota; Metazoa; Cnidaria; Anthozoa; Hexacorallia; Scleractinia; Fungiina; Poritidae; Porites		Red Sea	taxon:51062		SA0340a			Sanger dideoxy sequencing
MK881204	0.444	MK881204.1	Porites lutea	Porites lutea voucher SA0340b small subunit ribosomal RNA gene, partial sequence; internal transcribed spacer 1, 5.8S ribosomal RNA gene, and internal transcribed spacer 2, complete sequence; and large subunit ribosomal RNA gene, partial sequence	DNA	Fri May 01 00:00:00 EDT 2020	AGGTTTCCGTAGGTGAACCTGCGGAAGGATCATTACCGATGTGAAAAATCCAAGGTTAAACATCATTAACCAACCAGTGTGAACTGTGAAACAACTCTTTAGGGGTCGGCACAGGCGTGTGTCGTTAAATGGCGGATAGGTTCCTTCCGCCAGCCCCGCCATTGTGTTTATTATATCACTTTGAACGTTAAAGACTGAGAACTATGTATCATGCATTAAATGTATGAGAAAGAAGGAAAGAAAAATGAGAGACAACTTTTGACGGTGGATCTCTTGGCTCACGTATCGATGAAGAACGCAGCCAGCTGCGATATGTAGTGTGAATTGCAGAATTCAGTGAATCATTGAATCTTTGAACGCAAATGGCGCTCTTGGGTTCTCCCAGGAGCATGTCTGTCT…	669	Eukaryota; Metazoa; Cnidaria; Anthozoa; Hexacorallia; Scleractinia; Fungiina; Poritidae; Porites		Red Sea	taxon:51062		SA0340b			Sanger dideoxy sequencing
MK881207	0.446	MK881207.1	Porites lutea	Porites lutea voucher SA0363a small subunit ribosomal RNA gene, partial sequence; internal transcribed spacer 1, 5.8S ribosomal RNA gene, and internal transcribed spacer 2, complete sequence; and large subunit ribosomal RNA gene, partial sequence	DNA	Fri May 01 00:00:00 EDT 2020	AGGTTTCCGTAGGTGAACCTGCGGAAGGATCATTACCGATGTGAAAAAATCCAAGGTTAAACATCATTAACCAACCAGTGTGAACTGTGAAACAACTCTTTAGGGGTCGGCACAGGCGTGTGTCGTTAAATGGCGGATAGGTTCCTTCCGCCAGCCCCGCCATTGTGTTTATGATATCCCTTTGAACGTTTAAGACTGAGAACGTATGTATCATGCATTAAATGTATGAGAAAGAAGGAAAGAAAAATGAGAGACAACTTTTGACGGTGGATCTCTTGGCTCACGTATCGATGAAGAACGCAGCCAGCTGCGATATGTAGTGTGAATTGCAGAATTCAGTGAATCATTGAATCTTTGAACGCAAATGGCGCTCTTGGGTTCTCCCAGGAGCATGTCTGT…	671	Eukaryota; Metazoa; Cnidaria; Anthozoa; Hexacorallia; Scleractinia; Fungiina; Poritidae; Porites		Red Sea	taxon:51062		SA0363a			Sanger dideoxy sequencing
MK881208	0.445	MK881208.1	Porites lutea	Porites lutea voucher SA0363b small subunit ribosomal RNA gene, partial sequence; internal transcribed spacer 1, 5.8S ribosomal RNA gene, and internal transcribed spacer 2, complete sequence; and large subunit ribosomal RNA gene, partial sequence	DNA	Fri May 01 00:00:00 EDT 2020	AGGTTTCCGTAGGTGAACCTGCGGAAGGATCATTACCGATGTGAAAAAATCCAAGGTTAAACATCATTAACCAACCAGTGTGAACTGTGAAACAACTCTTTAGGGGTCGGCACAGGCGTGTGTCGTTAAATGGCGGATAGGTTCCTTCCGCCAGCCCCGCCATTGTGTTTATGATATCACTTTGAACGTTTAAGACTGAGAACGTATGTATCATGCATTAAATGTATGAGAAAGAAGGAAAGAAAAATGAGAGACAACTTTTGACGGTGGATCTCTTGGCTCACGTATCGATGAAGAACGCAGCCAGCTGCGATATGTAGTGTGAATTGCAGAATTCAGTGAATCATTGAATCTTTGAACGCAAATGGCGCTCTTGGGTTCTCCCAGGAGCATGTCTGT…	679	Eukaryota; Metazoa; Cnidaria; Anthozoa; Hexacorallia; Scleractinia; Fungiina; Poritidae; Porites		Red Sea	taxon:51062		SA0363b			Sanger dideoxy sequencing
MK881215	0.445	MK881215.1	Porites lutea	Porites lutea voucher SA0388 small subunit ribosomal RNA gene, partial sequence; internal transcribed spacer 1, 5.8S ribosomal RNA gene, and internal transcribed spacer 2, complete sequence; and large subunit ribosomal RNA gene, partial sequence	DNA	Fri May 01 00:00:00 EDT 2020	AGGTTTCCGTAGGTGAACCTGCGGAAGGATCATTACCGATGTGAAAAAATCCAAGGTTAAACATCATTAACCAACCAGTGTGAACTGTGAAACAACTCTTTAGGGGTCGGCACAGGCGTGTGTCGTTAAATGGCGGATAGGTTCCTTCCGCCAGCCCCGCCATTGTGTTTATGATATCACTTTGAACGTTTAAGACTGAGAACGTATGTATCATGCATTAAATGTATGAGAAAGAAGGAAAGAAAAATGAGAGACAACTTTTGACGGTGGATCTCTTGGCTCACGTATCGATGAAGAACGCAGCCAGCTGCGATATGTAGTGTGAATTGCAGAATTCAGTGAATCATTGAATCTTTGAACGCAAATGGCGCTCTTGGGTTCTCCCAGGAGCATGTCTGT…	679	Eukaryota; Metazoa; Cnidaria; Anthozoa; Hexacorallia; Scleractinia; Fungiina; Poritidae; Porites		Red Sea	taxon:51062		SA0388			Sanger dideoxy sequencing
MK881216	0.444	MK881216.1	Porites lutea	Porites lutea voucher SA0389a small subunit ribosomal RNA gene, partial sequence; internal transcribed spacer 1, 5.8S ribosomal RNA gene, and internal transcribed spacer 2, complete sequence; and large subunit ribosomal RNA gene, partial sequence	DNA	Fri May 01 00:00:00 EDT 2020	AGGTTTCCGTAGGTGAACGTGCGGAAGGATCATTACCGATGTGAAAAATCCAAGGTTAAACATCATTAACCAACCAGTGTGAACTGTGAAACAACTCTTTAGGGGTCGGCACAGGCGTGTGTCGTTAAATGGCGGATAGGTTCCTTCCGCCAGCCCCGCCATTGTGTTTATGATATCACTTTGAACGTTTAAGACTGAGAACGTATGTATCATGCATTAAATGTATGAGAAAGAAAGAAAGAAAAATGAGAGACAACTTTTGACGGTGGATCTCTTGGCTCACGTATCGATGAAGAACGCAGCCAGCTGCGATATGTAGTGTGAATTGCAGAATTCAGTGAATCATTGAATCTTTGAACGCAAATGGCGCTCTTGGGTTCTCCCAGGAGCATGTCTGTC…	676	Eukaryota; Metazoa; Cnidaria; Anthozoa; Hexacorallia; Scleractinia; Fungiina; Poritidae; Porites		Red Sea	taxon:51062		SA0389a			Sanger dideoxy sequencing
MK881217	0.445	MK881217.1	Porites lutea	Porites lutea voucher SA0389b small subunit ribosomal RNA gene, partial sequence; internal transcribed spacer 1, 5.8S ribosomal RNA gene, and internal transcribed spacer 2, complete sequence; and large subunit ribosomal RNA gene, partial sequence	DNA	Fri May 01 00:00:00 EDT 2020	AGGTTTCCGTAGGTGAACGTGCGGAAGGATCATTACCGATGTGAAAAATCCAAGGTTAAACATCATTAACCAACCAGTGTGAACTGTGAAACAACTCTTTAGGGGTCGGCACAGGCGTGTGTCGTTAAATGGCGGATAGGTTCCTTCCGCCAGCCCCGCCATTGTGTTTATGATATCACTTTGAACGTTTAAGACTGAGAACGTATGTATCATGCATTAAATGTATGAGAAAGAAGGAAAGAAAAATGAGAGACAACTTTTGACGGTGGATCTCTTGGCTCACGTATCGATGAAGAACGCAGCCAGCTGCGATATGTAGTGTGAATTGCAGAATTCAGTGAATCATTGAATCTTTGAACGCAAATGGCGCTCTTGGGTTCTCCCAGGAGCATGTCTGTC…	676	Eukaryota; Metazoa; Cnidaria; Anthozoa; Hexacorallia; Scleractinia; Fungiina; Poritidae; Porites		Red Sea	taxon:51062		SA0389b			Sanger dideoxy sequencing
MK881218	0.447	MK881218.1	Porites annae	Porites annae voucher SA0390a small subunit ribosomal RNA gene, partial sequence; internal transcribed spacer 1, 5.8S ribosomal RNA gene, and internal transcribed spacer 2, complete sequence; and large subunit ribosomal RNA gene, partial sequence	DNA	Fri May 01 00:00:00 EDT 2020	AGGTTTCCGTAGGTGAACCTGCGGAAGGATCATTACCGATGTGAAAAAATCCAAGGTTAAACATCATTAACCAACCAGTGTGAACTGTGAAACAACTCTTTAGGGGTCGGCACAGGCGTGTGTCGTTAAATGGCGGATAGGTTCCTTCCGCCAGCCCCGCCATTGTGTTTATGATATCCCTTTGAACGTTTAAGACTGAGAACGTATGTATCATGCATGAAATGTATGAGAAAGAAGGAAAGAAAAATGAGAGACAACTTTTGACGGTGGATCTCTTGGCTCACGTATCGATGAAGAACGCAGCCAGCTGCGATATGTAGTGTGAATTGCAGAATTCAGTGAATCATTGAATCTTTGAACGCAAATGGCGCTCTTGGGTTCTCCCAGGAGCATGTCTGT…	671	Eukaryota; Metazoa; Cnidaria; Anthozoa; Hexacorallia; Scleractinia; Fungiina; Poritidae; Porites		Red Sea	taxon:596308		SA0390a			Sanger dideoxy sequencing
MK881219	0.445	MK881219.1	Porites annae	Porites annae voucher SA0390b small subunit ribosomal RNA gene, partial sequence; internal transcribed spacer 1, 5.8S ribosomal RNA gene, and internal transcribed spacer 2, complete sequence; and large subunit ribosomal RNA gene, partial sequence	DNA	Fri May 01 00:00:00 EDT 2020	AGGTTTCCGTAGGTGAACCTGCGGAAGGATCATTACCGATGTGAAAAATCCAAGGTTAAACATCATTAACCAACCAGTGTGAACTGTGAAACAACTCTTTAGGGGTCGGCACAGGCGTGTGTCGTTAAATGGCGGATAGGTTCCTTCCGCCAGCCCCGCCATTGTGTTTATGATATCACTTTGAACGTTAAAGACTGAGAACGTATGTATCATGCATTAAATGTATGAGAAAGAAGGAAAGAAAAATGAGAGACAACTTTTGACGGTGGATCTCTTGGCTCACGTATCGATGAAGAACGCAGCCAGCTGCGATATGTAGTGTGAATTGCAGAATTCAGTGAATCATTGAATCTTTGAACGCAAATGGCGCTCTTGGGTTCTCCCAGGAGCATGTCTGTC…	678	Eukaryota; Metazoa; Cnidaria; Anthozoa; Hexacorallia; Scleractinia; Fungiina; Poritidae; Porites		Red Sea	taxon:596308		SA0390b			Sanger dideoxy sequencing
MK881225	0.447	MK881225.1	Porites lutea	Porites lutea voucher SA0765 small subunit ribosomal RNA gene, partial sequence; internal transcribed spacer 1, 5.8S ribosomal RNA gene, and internal transcribed spacer 2, complete sequence; and large subunit ribosomal RNA gene, partial sequence	DNA	Fri May 01 00:00:00 EDT 2020	AGGTTTCCGTAGGTGAACCTGCGGAAGGATCATTACCGATGTGAAAAAATCCAAGGTTAAACATCATTAACCAGTGTGAACTGTGAAACAACTCTTTAGGGGTCGGCACAGGCGTGTGTCGTTAAATGGCGGATAGGTTCCTTCCGCCAGCCCCGCCATTGTGTTTATGATATCACTTTGAACGTTTAAGACTGAGAACGTATGTATCATGCATGAAATGTATGAGAAAGAAGGAAAGAAAAATGAGAGACAACTTTTGACGGTGGATCTCTTGGCTCACGTATCGATGAAGAACGCAGCCAGCTGCGATATGTAGTGTGAATTGCAGAATTCAGTGAATCATTGAATCTTTGAACGCAAATGGCGCTCTTGGGTTCTCCCAGGAGCATGTCTGTCTGA…	669	Eukaryota; Metazoa; Cnidaria; Anthozoa; Hexacorallia; Scleractinia; Fungiina; Poritidae; Porites		Red Sea	taxon:51062		SA0765			Sanger dideoxy sequencing
MK881227	0.446	MK881227.1	Porites lobata	Porites lobata voucher SA0770 small subunit ribosomal RNA gene, partial sequence; internal transcribed spacer 1, 5.8S ribosomal RNA gene, and internal transcribed spacer 2, complete sequence; and large subunit ribosomal RNA gene, partial sequence	DNA	Fri May 01 00:00:00 EDT 2020	AGGTTTCCGTAGGTGAACCTGCGGAAGGATCATTACCGATGTGAAAAAATCCAAGGTTAAACATCATTAACCAACCAGTGTGAACTGTGAAACAACTCTTTAGGGGTCGGCACAGGCGTGTGTCGTTAAATGGCGGATAGGTTCCTTCCGCCAGCCCCGCCATTGTGTTTATGATATCCCTTTGAACGTTTAAGACTGAGAACGTATGTATCATGCATTAAATGTATGAGAAAGAAGGAAAGAAAAATGAGAGACAACTTTTGACGGTGGATCTCTTGGCTCACGTATCGATGAAGAACGCAGCCAGCTGCGATATGTAGTGTGAATTGCAGAATTCAGTGAATCATTGAATCTTTGAACGCAAATGGCGCTCTTGGGTTCTCCCAGGAGCATGTCTGT…	671	Eukaryota; Metazoa; Cnidaria; Anthozoa; Hexacorallia; Scleractinia; Fungiina; Poritidae; Porites		Red Sea	taxon:104759		SA0770			Sanger dideoxy sequencing
MK881229	0.445	MK881229.1	Porites annae	Porites annae voucher SA0876a small subunit ribosomal RNA gene, partial sequence; internal transcribed spacer 1, 5.8S ribosomal RNA gene, and internal transcribed spacer 2, complete sequence; and large subunit ribosomal RNA gene, partial sequence	DNA	Fri May 01 00:00:00 EDT 2020	AGGTTTCCGTAGGTGAACCTGCGGAAGGATCATTACCGATGTGAAAAATCCAAGGTTAAACATCATTAACCAACCAGTGTGAACTGTGAAACAACTCTTTAGGGGTCGGCACAGGCGTGTGTCGTTAAATGGCGGATAGGTTCCTTCCGCCAGCCCCGCCATTGTGTTTATGATATCACTTTGAACGTTTAAGACTGAGAACGTATGTATCATGCATTAAATGTATGAGAAAGAAGGAAAGAAAAATGAGAGACAACTTTTGACGGTGGATCTCTTGGCTCACGTATCGATGAAGAACGCAGCCAGCTGCGATATGTAGTGTGAATTGCAGAATTCAGTGAATCATTGAATCTTTGAACGCAAATGGCGCTCTTGGGTTCTCCCAGGAGCATGTCTGTC…	670	Eukaryota; Metazoa; Cnidaria; Anthozoa; Hexacorallia; Scleractinia; Fungiina; Poritidae; Porites		Red Sea	taxon:596308		SA0876a			Sanger dideoxy sequencing
MK881230	0.446	MK881230.1	Porites annae	Porites annae voucher SA0876b small subunit ribosomal RNA gene, partial sequence; internal transcribed spacer 1, 5.8S ribosomal RNA gene, and internal transcribed spacer 2, complete sequence; and large subunit ribosomal RNA gene, partial sequence	DNA	Fri May 01 00:00:00 EDT 2020	AGGTTTCCGTAGGTGAACCTGCGGAAGGATCATTACCGATGTGAAAAATCCAAGGTTAAACATCATTAACCAACCAGTGTGAACTGTGAAACAACTCTTTAGGGGTCGGCACAGGCGTGTGTCGTTAAATGGCGGATAGGTTCCTTCCGCCAGCCCCGCCATTGTGTTTATGATATCACTTTGAACGTTTAAGACTGAGAACGTATGTATCATGCATTAAATGTATGAGAAAGAAGGAAAGAAAAATGAGAGACAACTTTTGACGGTGGATCTCTTGGCTCACGTATCGATGAAGAACGCAGCCAGCTGCGATATGTAGTGTGAATTGCAGAATTCAGTGAATCATTGAATCTTTGAACGCAAATGGCGCTCTTGGGTTCTCCCAGGAGCATGTCTGTC…	670	Eukaryota; Metazoa; Cnidaria; Anthozoa; Hexacorallia; Scleractinia; Fungiina; Poritidae; Porites		Red Sea	taxon:596308		SA0876b			Sanger dideoxy sequencing
MK881237	0.445	MK881237.1	Porites lutea	Porites lutea voucher SA1448 small subunit ribosomal RNA gene, partial sequence; internal transcribed spacer 1, 5.8S ribosomal RNA gene, and internal transcribed spacer 2, complete sequence; and large subunit ribosomal RNA gene, partial sequence	DNA	Fri May 01 00:00:00 EDT 2020	AGGTTTCCGTAGGTGAACCTGCGGAAGGATCATTACCGATGTGAAAAATCCAAGGTTAAACATCATTAACCAACCAGTGTGAACTGTGAAACAACTCTTTAGGGGTCGGCACAGGCGTGTGTCGTTAAATGGCGGATAGGTTCCTTCCGCCAGCCCCGCCATTGTGTTTATGATATCACTTTGAACGTTAAAGACTGAGAACGTATGTATCATGCATGAAATGTATGAGAAAGAAGGAAAGAAAAATGAGAGACAACTTTTGACGGTGGATCTCTTGGCTCACGTATCGATGAAGAACGCAGCCAGCTGCGATATGTAGTGTGAATTGCAGAATTCAGTGAATCATTGAATCTTTGAACGCAAATGGCGCTCTTGGGTTCTCCCAGGAGCATGTCTGTC…	670	Eukaryota; Metazoa; Cnidaria; Anthozoa; Hexacorallia; Scleractinia; Fungiina; Poritidae; Porites		Red Sea	taxon:51062		SA1448			Sanger dideoxy sequencing
MK881238	0.445	MK881238.1	Porites lutea	Porites lutea voucher SA1449a small subunit ribosomal RNA gene, partial sequence; internal transcribed spacer 1, 5.8S ribosomal RNA gene, and internal transcribed spacer 2, complete sequence; and large subunit ribosomal RNA gene, partial sequence	DNA	Fri May 01 00:00:00 EDT 2020	AGGTTTCCGTAGGTGAACCTGCGGAAGGATCATTACCGATGTGAAAAATCCAAGGTTAAACATCATTAACCAACCAGTGTGAACTGTGAAACAACTCTTTAGGGGTCGGCACAGGCGTGTGTCGTTAAATGGCGGATAGGTTCCTTCCGCCAGCCCCGCCATTGTGTTTATGATATCACTTTGAACGTTAAAGACTGAGAACGTATGTATCATGCATAAAATGTATGAGAAAGAAGGAAAGAAAAATGAGAGACAACTTTTGACGGTGGATCTCTTGGCTCACGTATCGATGAAGAACGCAGCCAGCTGCGATATGTAGTGTGAATTGCAGAATTCAGTGAATCATTGAATCTTTGAACGCAAATGGCGCTCTTGGGTTCTCCCAGGAGCATGTCTGTC…	670	Eukaryota; Metazoa; Cnidaria; Anthozoa; Hexacorallia; Scleractinia; Fungiina; Poritidae; Porites		Red Sea	taxon:51062		SA1449a			Sanger dideoxy sequencing
MK881239	0.446	MK881239.1	Porites lutea	Porites lutea voucher SA1449b small subunit ribosomal RNA gene, partial sequence; internal transcribed spacer 1, 5.8S ribosomal RNA gene, and internal transcribed spacer 2, complete sequence; and large subunit ribosomal RNA gene, partial sequence	DNA	Fri May 01 00:00:00 EDT 2020	AGGTTTCCGTAGGTGAACCTGCGGAAGGATCATTACCGATGTGAAAAATCCAAGGTTAAACATCATTAACCAACCAGTGTGAACTGTGAAACAACTCTTTAGGGGTCGGCACAGGCGTGTGTCGTTAAATGGCGGATAGGTTCCTTCCGCCAGCCCCGCCATTGTGTTTATGATATCACTTTGAACGTTAAAGACTGAGAACGTATGTATCATGCATGAAATGTATGAGAAAGAAGGAAAGAAAAATGAGAGACAACTTTTGACGGTGGATCTCTTGGCTCACGTATCGATGAAGAACGCAGCCAGCTGCGATATGTAGTGTGAATTGCAGAATTCAGTGAATCATTGAATCTTTGAACGCAAATGGCGCTCTTGGGTTCTCCCAGGAGCATGTCTGTC…	670	Eukaryota; Metazoa; Cnidaria; Anthozoa; Hexacorallia; Scleractinia; Fungiina; Poritidae; Porites		Red Sea	taxon:51062		SA1449b			Sanger dideoxy sequencing
MK881240	0.446	MK881240.1	Porites solida	Porites solida voucher SA1490 small subunit ribosomal RNA gene, partial sequence; internal transcribed spacer 1, 5.8S ribosomal RNA gene, and internal transcribed spacer 2, complete sequence; and large subunit ribosomal RNA gene, partial sequence	DNA	Fri May 01 00:00:00 EDT 2020	AGGTTTCCGTAGGTGAACCTGCGGAAGGATCATTACCGATGTGAAAAATCCAAGGTTAAACATCATTAACCAACCAGTGTGAACTGTGAAACAACTCTTTAGGGGTCGGCACAGGCGTGTGTCGTTAAATGGCGGATAGGTTCCTTCCGCCAGCCCCGCCATTGTGTTTATGATATCACTTTGAACGTTAAAGACTGAGAACGTATGTATCATGCATGAAATGTATGAGAAAGAAGGAAAGAAAAATGAGAGACAACTTTTGACGGTGGATCTCTTGGCTCACGTATCGATGAAGAACGCAGCCAGCTGCGATATGTAGTGTGAATTGCAGAATTCAGTGAATCATTGAATCTTTGAACGCAAATGGCGCTCTTGGGTTCTCCCAGGAGCATGTCTGTC…	670	Eukaryota; Metazoa; Cnidaria; Anthozoa; Hexacorallia; Scleractinia; Fungiina; Poritidae; Porites		Red Sea	taxon:627028		SA1490			Sanger dideoxy sequencing
MK881241	0.444	MK881241.1	Porites lutea	Porites lutea voucher SA1491a small subunit ribosomal RNA gene, partial sequence; internal transcribed spacer 1, 5.8S ribosomal RNA gene, and internal transcribed spacer 2, complete sequence; and large subunit ribosomal RNA gene, partial sequence	DNA	Fri May 01 00:00:00 EDT 2020	AGGTTTCCGTAGGTGAACCTGCGGAAGGATCATTACCGATGTGAAAAAATCCAAGGTTAAACATCATTAACCAACCAGTGTGAACTGTACAACAACTCTTTAGGGGTCGGCACAGGCGTGTGTCGTTAAATGGCGGATAGGTTCCTTCCGCCAGCCCCGCCATTGTGTTTATGATATCACTTTGAACGTTTAAGACTGAGAACGTATGTATCATGCATTAAATGTATGAGAAAGAAGGAAAGAAAAATGAGAGACAACTTTTGACGGTGGATCTCTTGGCTCACGTATCGATGAAGAACGCAGCCAGCTGCGATATGTAGTGTGAATTGCAGAATTCAGTGAATCATTGAATCTTTGAACGCAAATGGCGCTCTTGGGTTCTCCCAGGAGCATGTCTGT…	671	Eukaryota; Metazoa; Cnidaria; Anthozoa; Hexacorallia; Scleractinia; Fungiina; Poritidae; Porites		Red Sea	taxon:51062		SA1491a			Sanger dideoxy sequencing
MK881242	0.446	MK881242.1	Porites lutea	Porites lutea voucher SA1491b small subunit ribosomal RNA gene, partial sequence; internal transcribed spacer 1, 5.8S ribosomal RNA gene, and internal transcribed spacer 2, complete sequence; and large subunit ribosomal RNA gene, partial sequence	DNA	Fri May 01 00:00:00 EDT 2020	AGGTTTCCGTAGGTGAACCTGCGGAAGGATCATTACCGATGTGAAAAAATCCAAGGTTAAACATCATTAACCAACCAGTGTGAACTGTGCAACAACTCTTTAGGGGTCGGCACAGGCGTGTGTCGTTAAATGGCGGATAGGTTCCTTCCGCCAGCCCCGCCATTGTGTTTATGATATCACTTTGAACGTTTAAGACTGAGAACGTATGTATCATGCATTAAATGTATGAGAAAGAAGGAAAGAAAAATGAGAGACAACTTTTGACGGTGGATCTCTTGGCTCACGTATCGATGAAGAACGCAGCCAGCTGCGATATGTAGTGTGAATTGCAGAATTCAGTGAATCATTGAATCTTTGAACGCAAATGGCGCTCTTGGGTTCTCCCAGGAGCATGTCTGT…	671	Eukaryota; Metazoa; Cnidaria; Anthozoa; Hexacorallia; Scleractinia; Fungiina; Poritidae; Porites		Red Sea	taxon:51062		SA1491b			Sanger dideoxy sequencing
MK881243	0.446	MK881243.1	Porites lutea	Porites lutea voucher SA1493 small subunit ribosomal RNA gene, partial sequence; internal transcribed spacer 1, 5.8S ribosomal RNA gene, and internal transcribed spacer 2, complete sequence; and large subunit ribosomal RNA gene, partial sequence	DNA	Fri May 01 00:00:00 EDT 2020	AGGTTTCCGTAGGTGAACCTGCGGAAGGATCATTACCGATGTGAAAAAATCCAAGGTTAAACATCATTAACCAACCAGTGTGAACTGTGAAACAACTCTTTAGGGGTCGGCACAGGCGTGTGTCGTTAAATGGCGGATAGGTTCCTTCCGCCAGCCCCGCCATTGTGTTTATGATATCACTTTGAACGTTTAAGACTGAGAACGTATGTATCATGCATTAAATGTATGAGAAAGAAGGAAAGAAAAATGAGAGACAACTTTTGACGGTGGATCTCTTGGCTCACGTATCGATGAAGAACGCAGCCAGCTGCGATATGTAGTGTGAATTGCAGAATTCAGTGAATCATTGAATCTTTGAACGCAAATGGCGCTCTTGGGTTCTCCCAGGAGCATGTCTGT…	671	Eukaryota; Metazoa; Cnidaria; Anthozoa; Hexacorallia; Scleractinia; Fungiina; Poritidae; Porites		Red Sea	taxon:51062		SA1493			Sanger dideoxy sequencing
MK881245	0.443	MK881245.1	Porites annae	Porites annae voucher SA1518 small subunit ribosomal RNA gene, partial sequence; internal transcribed spacer 1, 5.8S ribosomal RNA gene, and internal transcribed spacer 2, complete sequence; and large subunit ribosomal RNA gene, partial sequence	DNA	Fri May 01 00:00:00 EDT 2020	AGGTTTCCGTAGGTGAACCTGCGGAAGGATCATTACCGATGTGAAAAAATCCAAGGTTAAACATCATTAACCAGTGTGAACTGTGAAACAACTCTTTAGGGGTCGGCACAGGCGTGTGTCGTTAAATGGCGGATAGGTTCCTTCCGCCAGCCCCGCCATTGTGTTTATTATATCACTTTGAACGTTAAAGACTGAGAACGTATGTATCATGCATTAAATGTATGAGAAAGAAGGAAAGAAAAATGAGAGACAACTTTTGACGGTGGATCTCTTGGCTCACGTATCGATGAAGAACGCAGCCAGCTGCGATATGTAGTGTGAATTGCAGAATTCAGTGAATCATTGAATCTTTGAACGCAAATGGCGCTCTTGGGTTCTCCCAGGAGCATGTCTGTCTGA…	671	Eukaryota; Metazoa; Cnidaria; Anthozoa; Hexacorallia; Scleractinia; Fungiina; Poritidae; Porites		Red Sea	taxon:596308		SA1518			Sanger dideoxy sequencing
MK881246	0.446	MK881246.1	Porites lutea	Porites lutea voucher SA1574a small subunit ribosomal RNA gene, partial sequence; internal transcribed spacer 1, 5.8S ribosomal RNA gene, and internal transcribed spacer 2, complete sequence; and large subunit ribosomal RNA gene, partial sequence	DNA	Fri May 01 00:00:00 EDT 2020	AGGTTTCCGTAGGTGAACCTGCGGAAGGATCATTACCGATGTGAAAAATCCAAGGTTAAACATCATTAACCAACCAGTGTGAACTGTGAAACAACTCTTTAGGGGTCGGCACAGGCGTGTGTCGTTAAATGGCGGATAGGTTCCTTCCGCCAGCCCCGCCATTGTGTTTATGATATCACTTTGAACGTTAAAGACTGAGAACGTATGTATCATGCATGAAATGTATGAGAAAGAAGGAAAGAAAAATGAGAGACAACTTTTGACGGTGGATCTCTTGGCTCACGTATCGATGAAGAACGCAGCCAGCTGCGATATGTAGTGTGAATTGCAGAATTCAGTGAATCATTGAATCTTTGAACGCAAATGGCGCTCTTGGGTTCTCCCAGGAGCATGTCTGTC…	670	Eukaryota; Metazoa; Cnidaria; Anthozoa; Hexacorallia; Scleractinia; Fungiina; Poritidae; Porites		Red Sea	taxon:51062		SA1574a			Sanger dideoxy sequencing
MK881247	0.448	MK881247.1	Porites lutea	Porites lutea voucher SA1574b small subunit ribosomal RNA gene, partial sequence; internal transcribed spacer 1, 5.8S ribosomal RNA gene, and internal transcribed spacer 2, complete sequence; and large subunit ribosomal RNA gene, partial sequence	DNA	Fri May 01 00:00:00 EDT 2020	AGGTTTCCGTAGGTGAACCTGCGGAAGGATCATTACCGATGTGAAAAATCCAAGGTTAAACATCATTAACCAACCAGTGTGAACTGTGAAACAACTCTTTAGGGGTCGGCACAGGCGTGTGTCGTTAAATGGCGGATAGGTTCCTTCCGCCAGCCCCGCCATTGTGTTTATGATATCACTTTGAACGTTAAAGACTGAGAACGTATGTATCATGCATGAAATGTATGAGAAAGAAGGAAAGAAAAATGAGAGACAACTTTTGACGGTGGATCTCTTGGCTCACGTATCGATGAAGAACGCAGCCAGCTGCGATATGTAGTGTGAATTGCAGAATTCAGTGAATCATTGAATCTTTGAACGCAAATGGCGCTCTTGGGTTCTCCCAGGAGCATGTCTGTC…	670	Eukaryota; Metazoa; Cnidaria; Anthozoa; Hexacorallia; Scleractinia; Fungiina; Poritidae; Porites		Red Sea	taxon:51062		SA1574b			Sanger dideoxy sequencing
MK881249	0.445	MK881249.1	Porites echinulata	Porites echinulata voucher SA1581 small subunit ribosomal RNA gene, partial sequence; internal transcribed spacer 1, 5.8S ribosomal RNA gene, and internal transcribed spacer 2, complete sequence; and large subunit ribosomal RNA gene, partial sequence	DNA	Fri May 01 00:00:00 EDT 2020	AGGTTTCCGTAGGTGAACCTGCGGAAGGATCATTACCGATGTGAAAAATCCAAGGTTAAACATCATTAACCAACCAGTGTGAACTGTGAAACAACTCTTTAGGGGTCGGCACAGGCGTGTGTCGTTAAATGGCGGATAGGTTCCTTCCGCCAGCCCCGCCATTGTGTTTATGATATCACTTTGAACGTTTAAGACTGAGAACGTATGTATCATGCATTAAATGTATGAGAAAGAAGGAAAGAAAAATGAGAGACAACTTTTGACGGTGGATCTCTTGGCTCACGTATCGATGAAGAACGCAGCCAGCTGCGATATGTAGTGTGAATTGCAGAATTCAGTGAATCATTGAATCTTTGAACGCAAATGGCGCTCTTGGGTTCTCCCAGGAGCATGTCTGTC…	674	Eukaryota; Metazoa; Cnidaria; Anthozoa; Hexacorallia; Scleractinia; Fungiina; Poritidae; Porites		Red Sea	taxon:627003		SA1581			Sanger dideoxy sequencing
MK881250	0.446	MK881250.1	Porites lobata	Porites lobata voucher SA1609a small subunit ribosomal RNA gene, partial sequence; internal transcribed spacer 1, 5.8S ribosomal RNA gene, and internal transcribed spacer 2, complete sequence; and large subunit ribosomal RNA gene, partial sequence	DNA	Fri May 01 00:00:00 EDT 2020	AGGTTTCCGTAGGTGAACCTGCGGAAGGATCATTACCGATGTGAAAAAATCCAAGGTTAAACATCATTAACCAACCAGTGTGAACTGTGAAACAACTCTTTAGGGGTCGGCACAGGCGTGTGTCGTTAAATGGCGGATAGGTTCCTTCCGCCAGCCCCGCCATTGTGTTTATGATATCACTTTGAACGTTAAAGACTGAGAACGTATGTATCATGCATAAAATGTATGAGAAAGAAGGAAAGAAAAATGAGAGACAACTTTTGACGGTGGATCTCTTGGCTCACGTATCGATGAAGAACGCAGCCAGCTGCGATATGTAGTGTGAATTGCAGAATTCAGTGAATCATTGAATCTTTGAACGCAAATGGCGCTCTTGGGTTCTCCCAGGAGCATGTCTGT…	670	Eukaryota; Metazoa; Cnidaria; Anthozoa; Hexacorallia; Scleractinia; Fungiina; Poritidae; Porites		Red Sea	taxon:104759		SA1609a			Sanger dideoxy sequencing
MK881251	0.448	MK881251.1	Porites lobata	Porites lobata voucher SA1609b small subunit ribosomal RNA gene, partial sequence; internal transcribed spacer 1, 5.8S ribosomal RNA gene, and internal transcribed spacer 2, complete sequence; and large subunit ribosomal RNA gene, partial sequence	DNA	Fri May 01 00:00:00 EDT 2020	AGGTTTCCGTAGGTGAACCTGCGGAAGGATCATTACCGATGTGAAAAAATCCAAGGTTAAACATCATTAACCAACCAGTGTGAACTGTGAAACAACTCTTTAGGGGTCGGCACAGGCGTGTGTCGTTAAATGGCGGATAGGTTCCTTCCGCCAGCCCCGCCATTGTGTTTATGATATCACTTTGAACGTTTAAGACTGAGAACGTATGTATCATGCATGAAATGTATGAGAAAGAAGGAAAGAAAAATGAGAGACAACTTTTGACGGTGGATCTCTTGGCTCACGTATCGATGAAGAACGCAGCCAGCTGCGATATGTAGTGTGAATTGCAGAATTCAGTGAATCATTGAATCTTTGAACGCAAATGGCGCTCTTGGGTTCTCCCAGGAGCATGTCTGT…	670	Eukaryota; Metazoa; Cnidaria; Anthozoa; Hexacorallia; Scleractinia; Fungiina; Poritidae; Porites		Red Sea	taxon:104759		SA1609b			Sanger dideoxy sequencing
MK881252	0.445	MK881252.1	Porites lobata	Porites lobata voucher SA1612a small subunit ribosomal RNA gene, partial sequence; internal transcribed spacer 1, 5.8S ribosomal RNA gene, and internal transcribed spacer 2, complete sequence; and large subunit ribosomal RNA gene, partial sequence	DNA	Fri May 01 00:00:00 EDT 2020	AGGTTTCCGTAGGTGAACCTGCGGAAGGATCATTACCGATGTGAAAAAATCCAAGGTTAAACATCATTAACCAACCAGTGTGAACTGTACAACAACTCTTTAGGGGTCGGCACAGGCGTGTGTCGTTAAATGGCGGATAGGTTCCTTCCGCCAGCCCCGCCATTGTGTTTATGATATCACTTTGAACGTTTAAGACTGAGAACGTATGTATCATGCATGATACAATGTATGAGAAAGAAGGAAAGAAAAATGAGAGACAACTTTTGACGGTGGATCTCTTGGCTCACGTATCGATGAAGAACGCAGCCAGCTGCGATATGTAGTGTGAATTGCAGAATTCAGTGAATCATTGAATCTTTGAACGCAAATGGCGCTCTTGGGTTCTCCCAGGAGCATGTC…	674	Eukaryota; Metazoa; Cnidaria; Anthozoa; Hexacorallia; Scleractinia; Fungiina; Poritidae; Porites		Red Sea	taxon:104759		SA1612a			Sanger dideoxy sequencing
MK881253	0.444	MK881253.1	Porites lobata	Porites lobata voucher SA1612b small subunit ribosomal RNA gene, partial sequence; internal transcribed spacer 1, 5.8S ribosomal RNA gene, and internal transcribed spacer 2, complete sequence; and large subunit ribosomal RNA gene, partial sequence	DNA	Fri May 01 00:00:00 EDT 2020	AGGTTTCCGTAGGTGAACCTGCGGAAGGATCATTACCGATGTGAAAAATCCAAGGTTAAACATCATTAACCAACCAGTGTGAACTGTACAACAACTCTTTAGGGGTCGGCACAGGCGTGTGTCGTTAAATGGCGGATAGGTTCCTTCCGCCAGCCCCGCCATTGTGTTTATGATATCACTTTGAACGTTAAAGACTGAGAACGTATGTATCATGCATTATACAATGTATGAGAAAGAAGGAAAGAAAAATGAGAGACAACTTTTGACGGTGGATCTCTTGGCTCACGTATCGATGAAGAACGCAGCCAGCTGCGATATGTAGTGTGAATTGCAGAATTCAGTGAATCATTGAATCTTTGAACGCAAATGGCGCTCTTGGGTTCTCCCAGGAGCATGTCT…	673	Eukaryota; Metazoa; Cnidaria; Anthozoa; Hexacorallia; Scleractinia; Fungiina; Poritidae; Porites		Red Sea	taxon:104759		SA1612b			Sanger dideoxy sequencing
MK881255	0.445	MK881255.1	Porites lobata	Porites lobata voucher SA1647a small subunit ribosomal RNA gene, partial sequence; internal transcribed spacer 1, 5.8S ribosomal RNA gene, and internal transcribed spacer 2, complete sequence; and large subunit ribosomal RNA gene, partial sequence	DNA	Fri May 01 00:00:00 EDT 2020	AGGTTTCCGTAGGTGAACCTGCGGAAGGATCATTACCGATGTGAAAAAATCCAAGGTTAAACATCATTAACCAACCAGTGTGAACTGTACAACAACTCTTTAGGGGTCGGCACAGGCGTGTGTCGTTAAATGGCGGATAGGTTCCTTCCGCCAGCCCCGCCATTGTGTTTATGATATCACTTTGAACGTTAAAGACTGAGAACGTATGTATCATGCATGAAATGTATGAGAAAGAAAGAAAGAAAAATGAGAGACAACTTTTGACGGTGGATCTCTTGGCTCACGTATCGATGAAGAACGCAGCCAGCTGCGATATGTAGTGTGAATTGCAGAATTCAGTGAATCATTGAATCTTTGAACGCAAATGGCGCTCTTGGGTTCTCCCAGGAGCATGTCTGT…	670	Eukaryota; Metazoa; Cnidaria; Anthozoa; Hexacorallia; Scleractinia; Fungiina; Poritidae; Porites		Red Sea	taxon:104759		SA1647a			Sanger dideoxy sequencing
MK881256	0.444	MK881256.1	Porites lobata	Porites lobata voucher SA1647b small subunit ribosomal RNA gene, partial sequence; internal transcribed spacer 1, 5.8S ribosomal RNA gene, and internal transcribed spacer 2, complete sequence; and large subunit ribosomal RNA gene, partial sequence	DNA	Fri May 01 00:00:00 EDT 2020	AGGTTTCCGTAGGTGAACCTGCGGAAGGATCATTACCGATGTGAAAAAATCCAAGGTTAAACATCATTAACCAACCAGTGTGAACTGTGAAACAACTCTTTAGGGGTCGGCACAGGCGTGTGTCGTTAAATGGCGGATAGGTTCCTTCCGCCAGCCCCGCCATTGTGTTTATGATATCACTTTGAACGTTAAAGACTGAGAACGTATGTATCATGCATGAAATGTATGAGAAAGAAAGAAAGAAAAATGAGAGACAACTTTTGACGGTGGATCTCTTGGCTCACGTATCGATGAAGAACGCAGCCAGCTGCGATATGTAGTGTGAATTGCAGAATTCAGTGAATCATTGAATCTTTGAACGCAAATGGCGCTCTTGGGTTCTCCCAGGAGCATGTCTGT…	675	Eukaryota; Metazoa; Cnidaria; Anthozoa; Hexacorallia; Scleractinia; Fungiina; Poritidae; Porites		Red Sea	taxon:104759		SA1647b			Sanger dideoxy sequencing
MK881257	0.441	MK881257.1	Porites lutea	Porites lutea voucher SA1702a small subunit ribosomal RNA gene, partial sequence; internal transcribed spacer 1, 5.8S ribosomal RNA gene, and internal transcribed spacer 2, complete sequence; and large subunit ribosomal RNA gene, partial sequence	DNA	Fri May 01 00:00:00 EDT 2020	AGGTTTCCGTAGGTGAACCTGCGGAAGGATCATTACCGATGTGAAAAATCCAAGGTTAAACATCATTAACCAACCAGTGTGAACTGTGAAACAACTCTTTAGGGGTCGGCACAGGCGTGTGTCGTTAAATGGCGGATAGGTTCCTTCCGCCAGCCCCGCCATTGTGTTTATTATATCACTTTGAACGTTTAAGACTGAGAACTATGTATCATGCATTAAATGTATGAGAAAGAAGGAAAGAAAAATGAGAGACAACTTTTGACGGTGGATCTCTTGGCTCACGTATCGATGAAGAACGCAGCCAGCTGCGATATGTAGTGTGAATTGCAGAATTCAGTGAATCATTGAATCTTTGAACGCAAATGGCGCTCTTGGGTTCTCCCAGGAGCATGTCTGTCT…	671	Eukaryota; Metazoa; Cnidaria; Anthozoa; Hexacorallia; Scleractinia; Fungiina; Poritidae; Porites		Red Sea	taxon:51062		SA1702a			Sanger dideoxy sequencing
MK881258	0.446	MK881258.1	Porites lutea	Porites lutea voucher SA1702b small subunit ribosomal RNA gene, partial sequence; internal transcribed spacer 1, 5.8S ribosomal RNA gene, and internal transcribed spacer 2, complete sequence; and large subunit ribosomal RNA gene, partial sequence	DNA	Fri May 01 00:00:00 EDT 2020	AGGTTTCCGTAGGTGAACCTGCGGAAGGATCATTACCGATGTGAAAAAATCCAAGGTTAAACATCATTAACCAACCAGTGTGAACTGTGAAACAACTCTTTAGGGGTCGGCACAGGCGTGTGTCGTTAAATGGCGGATAGGTTCCTTCCGCCAGCCCCGCCATTGTGTTTATTATATCACTTTGAACGTTTAAGACTGAGAACTATGTATCATGCATGAAATGTATGAGAAAGAAGGAAAGAAAAATGAGAGACAACTTTTGACGGTGGATCTCTTGGCTCACGTATCGATGAAGAACGCAGCCAGCTGCGATATGTAGTGTGAATTGCAGAATTCAGTGAATCATTGAATCTTTGAACGCAAATGGCGCTCTTGGGTTCTCCCAGGAGCATGTCTGTC…	670	Eukaryota; Metazoa; Cnidaria; Anthozoa; Hexacorallia; Scleractinia; Fungiina; Poritidae; Porites		Red Sea	taxon:51062		SA1702b			Sanger dideoxy sequencing
MK881259	0.445	MK881259.1	Porites lutea	Porites lutea voucher SA1703a small subunit ribosomal RNA gene, partial sequence; internal transcribed spacer 1, 5.8S ribosomal RNA gene, and internal transcribed spacer 2, complete sequence; and large subunit ribosomal RNA gene, partial sequence	DNA	Fri May 01 00:00:00 EDT 2020	AGGTTTCCGTAGGTGAACTTGCGGAAGGATCATTACCGATGTGAAATCCAAGGTTAAACATCATTAACCAGTGTGAACTGTGAAACAACTCTTTAGGGGTCGGCACAGGCGTGTGTCGTTAAATGGCGGATAGGTTCCTTCCGCCAGCCCCGCCATTGTGTTTATTATATCACTTTGAACGTTAAAGACTGAGAACGTATGTATCATGCATGATACAATGTATGAGAAAGAAGGAAAGAAAAATGAGAGACAACTTTTGACGGTGGATCTCTTGGCTCACGTATCGATGAAGAACGCAGCCAGCTGCGATATGTAGTGTGAATTGCAGAATTCAGTGAATCATTGAATCTTTGAACGCAAATGGCGCTCTTGGGTTCTCCCAGGAGCATGTCTGTCTGA…	667	Eukaryota; Metazoa; Cnidaria; Anthozoa; Hexacorallia; Scleractinia; Fungiina; Poritidae; Porites		Red Sea	taxon:51062		SA1703a			Sanger dideoxy sequencing
MK881260	0.441	MK881260.1	Porites lutea	Porites lutea voucher SA1703b small subunit ribosomal RNA gene, partial sequence; internal transcribed spacer 1, 5.8S ribosomal RNA gene, and internal transcribed spacer 2, complete sequence; and large subunit ribosomal RNA gene, partial sequence	DNA	Fri May 01 00:00:00 EDT 2020	AGGTTTCCGTAGGTGAACTTGCGGAAGGATCATTACCGATGTGAAAAATCCAAGGTTAAACATCATTAACCAGTGTGAACTGTGAAACAACTCTTTAGGGGTCGGCACAGGCGTGTGTCGTTAAATGGCGGATAGGTTCCTTCCGCCAGCCCCGCCATTGTGTTTATTATATCACTTTGAACGTTAAAGACTGAGAACGTATGTATCATGCATAATACAATGTATGAGAAAGAAGGAAAGAAAAATGAGAGACAACTTTTGACGGTGGATCTCTTGGCTCACGTATCGATGAAGAACGCAGCCAGCTGCGATATGTAGTGTGAATTGCAGAATTCAGTGAATCATTGAATCTTTGAACGCAAATGGCGCTCTTGGGTTCTCCCAGGAGCATGTCTGTCT…	669	Eukaryota; Metazoa; Cnidaria; Anthozoa; Hexacorallia; Scleractinia; Fungiina; Poritidae; Porites		Red Sea	taxon:51062		SA1703b			Sanger dideoxy sequencing
MK881262	0.446	MK881262.1	Porites solida	Porites solida voucher SA1705a small subunit ribosomal RNA gene, partial sequence; internal transcribed spacer 1, 5.8S ribosomal RNA gene, and internal transcribed spacer 2, complete sequence; and large subunit ribosomal RNA gene, partial sequence	DNA	Fri May 01 00:00:00 EDT 2020	AGGTTTCCGTAGGTGAACCTGCGGAAGGATCATTACCGATGTGAAAAATCCAAGGTTAAACATCATTAACCAACCAGTGTGAACTGTGAAACAACTCTTTAGGGGTCGGCACAGGCGTGTGTCGTTAAATGGCGGATAGGTTCCTTCCGCCAGCCCCGCCATTGTGTTTATGATATCCCTTTGAACGTTAAAGACTGAGAACGTATGTATCATGCATTAAATGTATGAGAAAGAAGGAAAGAAAAATGAGAGACAACTTTTGACGGTGGATCTCTTGGCTCACGTATCGATGAAGAACGCAGCCAGCTGCGATATGTAGTGTGAATTGCAGAATTCAGTGAATCATTGAATCTTTGAACGCAAATGGCGCTCTTGGGTTCTCCCAGGAGCATGTCTGTC…	670	Eukaryota; Metazoa; Cnidaria; Anthozoa; Hexacorallia; Scleractinia; Fungiina; Poritidae; Porites		Red Sea	taxon:627028		SA1705a			Sanger dideoxy sequencing
MK881263	0.445	MK881263.1	Porites solida	Porites solida voucher SA1705b small subunit ribosomal RNA gene, partial sequence; internal transcribed spacer 1, 5.8S ribosomal RNA gene, and internal transcribed spacer 2, complete sequence; and large subunit ribosomal RNA gene, partial sequence	DNA	Fri May 01 00:00:00 EDT 2020	AGGTTTCCGTAGGTGAACCTGCGGAAGGATCATTACCGATGTGAAAAATCCAAGGTTAAACATCATTAACCAACCAGTGTGAACTGTGAAACAACTCTTTAGGGGTCGGCACAGGCGTGTGTCGTTAAATGGCGGATAGGTTCCTTCCGCCAGCCCCGCCATTGTGTTTATGATATCACTTTGAACGTTAAAGACTGAGAACGTATGTATCATGCATTAAATGTATGAGAAAGAAGGAAAGAAAAATGAGAGACAACTTTTGACGGTGGATCTCTTGGCTCACGTATCGATGAAGAACGCAGCCAGCTGCGATATGTAGTGTGAATTGCAGAATTCAGTGAATCATTGAATCTTTGAACGCAAATGGCGCTCTTGGGTTCTCCCAGGAGCATGTCTGTC…	674	Eukaryota; Metazoa; Cnidaria; Anthozoa; Hexacorallia; Scleractinia; Fungiina; Poritidae; Porites		Red Sea	taxon:627028		SA1705b			Sanger dideoxy sequencing
MK881264	0.446	MK881264.1	Porites lutea	Porites lutea voucher SA1722 small subunit ribosomal RNA gene, partial sequence; internal transcribed spacer 1, 5.8S ribosomal RNA gene, and internal transcribed spacer 2, complete sequence; and large subunit ribosomal RNA gene, partial sequence	DNA	Fri May 01 00:00:00 EDT 2020	AGGTTTCCGTAGGTGAACCTGCGGAAGGATCATTACCGATGTGAAAAATCCAAGGTTAAACATCATTAACCAACCAGTGTGAACTGTGAAACAACTCTTTAGGGGTCGGCACAGGCGTGTGTCGTTAAATGGCGGATAGGTTCCTTCCGCCAGCCCCGCCATTGTGTTTATGATATCCCTTTGAACGTTAAAGACTGAGAACGTATGTATCATGCATTAAATGTATGAGAAAGAAGGAAAGAAAAATGAGAGACAACTTTTGACGGTGGATCTCTTGGCTCACGTATCGATGAAGAACGCAGCCAGCTGCGATATGTAGTGTGAATTGCAGAATTCAGTGAATCATTGAATCTTTGAACGCAAATGGCGCTCTTGGGTTCTCCCAGGAGCATGTCTGTC…	670	Eukaryota; Metazoa; Cnidaria; Anthozoa; Hexacorallia; Scleractinia; Fungiina; Poritidae; Porites		Red Sea	taxon:51062		SA1722			Sanger dideoxy sequencing
MK881267	0.444	MK881267.1	Porites lutea	Porites lutea voucher SA2081a small subunit ribosomal RNA gene, partial sequence; internal transcribed spacer 1, 5.8S ribosomal RNA gene, and internal transcribed spacer 2, complete sequence; and large subunit ribosomal RNA gene, partial sequence	DNA	Fri May 01 00:00:00 EDT 2020	AGGTTTCCGTAGGTGAACCTGCGGAAGGATCATTACCGATGTGAAAAAATCCAAGGTTAAACATCATTAACCAACCAGTGTGAACTGTACAACAACTCTTTAGGGGTCGGCACAGGCGTGTGTCGTTAAATGGCGGATAGGTTCCTTCCGCCAGCCCCGCCATTGTGTTTATGATATCACTTTGAACGTTAAAGACTGAGAACGTATGTATCATGCATTAAATGTATGAGAAAGAAGGAAAGAAAAATGAGAGACAACTTTTGACGGTGGATCTCTTGGCTCACGTATCGATGAAGAACGCAGCCAGCTGCGATATGTAGTGTGAATTGCAGAATTCAGTGAATCATTGAATCTTTGAACGCAAATGGCGCTCTTGGGTTCTCCCAGGAGCATGTCTGT…	675	Eukaryota; Metazoa; Cnidaria; Anthozoa; Hexacorallia; Scleractinia; Fungiina; Poritidae; Porites		Red Sea	taxon:51062		SA2081a			Sanger dideoxy sequencing
MK881268	0.445	MK881268.1	Porites lutea	Porites lutea voucher SA2081b small subunit ribosomal RNA gene, partial sequence; internal transcribed spacer 1, 5.8S ribosomal RNA gene, and internal transcribed spacer 2, complete sequence; and large subunit ribosomal RNA gene, partial sequence	DNA	Fri May 01 00:00:00 EDT 2020	AGGTTTCCGTAGGTGAACCTGCGGAAGGATCATTACCGATGTGAAAAATCCAAGGTTAAACATCATTAACCAACCAGTGTGAACTGTGAAACAACTCTTTAGGGGTCGGCACAGGCGTGTGTCGTTAAATGGCGGATAGGTTCCTTCCGCCAGCCCCGCCATTGTGTTTATGATATCACTTTGAACGTTTAAGACTGAGAACGTATGTATCATGCATTAAATGTATGAGAAAGAAGGAAAGAAAAATGAGAGACAACTTTTGACGGTGGATCTCTTGGCTCACGTATCGATGAAGAACGCAGCCAGCTGCGATATGTAGTGTGAATTGCAGAATTCAGTGAATCATTGAATCTTTGAACGCAAATGGCGCTCTTGGGTTCTCCCAGGAGCATGTCTGTC…	674	Eukaryota; Metazoa; Cnidaria; Anthozoa; Hexacorallia; Scleractinia; Fungiina; Poritidae; Porites		Red Sea	taxon:51062		SA2081b			Sanger dideoxy sequencing
MK881269	0.441	MK881269.1	Porites solida	Porites solida voucher SA2136 small subunit ribosomal RNA gene, partial sequence; internal transcribed spacer 1, 5.8S ribosomal RNA gene, and internal transcribed spacer 2, complete sequence; and large subunit ribosomal RNA gene, partial sequence	DNA	Fri May 01 00:00:00 EDT 2020	AGGTTTCCGTAGGTGAACCTGCGGAAGGATCATTACCGATGTGAAAAAATCCAAGGTTAAACATCATTAACCAGTGTGAACTGTGAAACAACTCTTTAGGGGTCGGCACAGGCGTGTGTCGTTAAATGGCGGATAGGTTCCTTCCGCCAGCCCCGCCATTGTGTTTATTATATCACTTTGAACGTTAAAGACTGAGAACGTATGTATCATGCATTAAATGTATGAGAAAGAAGGAAAGAAAAATGAGAGACAACTTTTGACGGTGGATCTCTTGGCTCACGTATCGATGAAGAACGCAGCCAGCTGCGATATGTAGTGTGAATTGCAGAATTCAGTGAATCATTGAATCTTTGAACGCAAATGGCGCTCTTGGGTTCTCCCAGGAGCATGTCTGTCTGA…	669	Eukaryota; Metazoa; Cnidaria; Anthozoa; Hexacorallia; Scleractinia; Fungiina; Poritidae; Porites		Red Sea	taxon:627028		SA2136			Sanger dideoxy sequencing
MK881270	0.441	MK881270.1	Porites solida	Porites solida voucher SA2138 small subunit ribosomal RNA gene, partial sequence; internal transcribed spacer 1, 5.8S ribosomal RNA gene, and internal transcribed spacer 2, complete sequence; and large subunit ribosomal RNA gene, partial sequence	DNA	Fri May 01 00:00:00 EDT 2020	AGGTTTCCGTAGGTGAACCTGCGGAAGGATCATTACCGATGTGAAAAAATCCAAGGTTAAACATCATTAACCAGTGTGAACTGTGAAACAACTCTTTAGGGGTCGGCACAGGCGTGTGTCGTTAAATGGCGGATAGGTTCCTTCCGCCAGCCCCGCCATTGTGTTTATTATATCACTTTGAACGTTAAAGACTGAGAACGTATGTATCATGCATTAAATGTATGAGAAAGAAGGAAAGAAAAATGAGAGACAACTTTTGACGGTGGATCTCTTGGCTCACGTATCGATGAAGAACGCAGCCAGCTGCGATATGTAGTGTGAATTGCAGAATTCAGTGAATCATTGAATCTTTGAACGCAAATGGCGCTCTTGGGTTCTCCCAGGAGCATGTCTGTCTGA…	669	Eukaryota; Metazoa; Cnidaria; Anthozoa; Hexacorallia; Scleractinia; Fungiina; Poritidae; Porites		Red Sea	taxon:627028		SA2138			Sanger dideoxy sequencing
MK881272	0.445	MK881272.1	Porites annae	Porites annae voucher SA2148a small subunit ribosomal RNA gene, partial sequence; internal transcribed spacer 1, 5.8S ribosomal RNA gene, and internal transcribed spacer 2, complete sequence; and large subunit ribosomal RNA gene, partial sequence	DNA	Fri May 01 00:00:00 EDT 2020	AGGTTTCCGTAGGTGAACCTGCGGAAGGATCATTACCGATGTGAAAAATCCAAGGTTAAACATCATTAACCAACCAGTGTGAACTGTGAAACAACTCTTTAGGGGTCGGCACAGGCGTGTGTCGTTAAATGGCGGATAGGTTCCTTCCGCCAGCCCCGCCATTGTGTTTATGATATCACTTTGAACGTTAAAGACTGAGAACGTATGTATCATGCATTAAATGTATGAGAAAGAAGGAAAGAAAAATGAGAGACAACTTTTGACGGTGGATCTCTTGGCTCACGTATCGATGAAGAACGCAGCCAGCTGCGATATGTAGTGTGAATTGCAGAATTCAGTGAATCATTGAATCTTTGAACGCAAATGGCGCTCTTGGGTTCTCCCAGGAGCATGTCTGTC…	674	Eukaryota; Metazoa; Cnidaria; Anthozoa; Hexacorallia; Scleractinia; Fungiina; Poritidae; Porites		Red Sea	taxon:596308		SA2148a			Sanger dideoxy sequencing
MK881276	0.445	MK881276.1	Porites echinulata	Porites echinulata voucher SA2156 small subunit ribosomal RNA gene, partial sequence; internal transcribed spacer 1, 5.8S ribosomal RNA gene, and internal transcribed spacer 2, complete sequence; and large subunit ribosomal RNA gene, partial sequence	DNA	Fri May 01 00:00:00 EDT 2020	AGGTTTCCGTAGGTGAACCTGCGGAAGGATCATTACCGATGTGAAAAATCCAAGGTTAAACATCATTAACCAACCAGTGTGAACTGTGAAACAACTCTTTAGGGGTCGGCACAGGCGTGTGTCGTTAAATGGCGGATAGGTTCCTTCCGCCAGCCCCGCCATTGTGTTTATGATATCACTTTGAACGTTAAAGACTGAGAACGTATGTATCATGCATTAAATGTATGAGAAAGAAGGAAAGAAAAATGAGAGACAACTTTTGACGGTGGATCTCTTGGCTCACGTATCGATGAAGAACGCAGCCAGCTGCGATATGTAGTGTGAATTGCAGAATTCAGTGAATCATTGAATCTTTGAACGCAAATGGCGCTCTTGGGTTCTCCCAGGAGCATGTCTGTC…	674	Eukaryota; Metazoa; Cnidaria; Anthozoa; Hexacorallia; Scleractinia; Fungiina; Poritidae; Porites		Red Sea	taxon:627003		SA2156			Sanger dideoxy sequencing
MK881279	0.447	MK881279.1	Porites lutea	Porites lutea voucher SA2163a small subunit ribosomal RNA gene, partial sequence; internal transcribed spacer 1, 5.8S ribosomal RNA gene, and internal transcribed spacer 2, complete sequence; and large subunit ribosomal RNA gene, partial sequence	DNA	Fri May 01 00:00:00 EDT 2020	AGGTTTCCGTAGGTGAACCTGCGGAAGGATCATTACCGATGTGAAAGAATCCAAGGTTAAACATCATTAACCAACCAGTGTGAACTGTACAACAACTCTTTAGGGGTCGGCACAGGCGTGTGTCGTTAAATGGCGGATAGGTTCCTTCCGCCAGCCCCGCCATTGTGTTTATGATATCACTTTGAACGTTTAAGACTGAGAACGTATGTATCATGCATTAAATGTATGAGAAAGAAGGAAAGAAAAATGAGAGACAACTTTTGACGGTGGATCTCTTGGCTCACGTATCGATGAAGAACGCAGCCAGCTGCGATATGTAGTGTGAATTGCAGAATTCAGTGAATCATTGAATCTTTGAACGCAAATGGCGCTCTTGGGTTCTCCCAGGAGCATGTCTGT…	671	Eukaryota; Metazoa; Cnidaria; Anthozoa; Hexacorallia; Scleractinia; Fungiina; Poritidae; Porites		Red Sea	taxon:51062		SA2163a			Sanger dideoxy sequencing
MK881280	0.445	MK881280.1	Porites lutea	Porites lutea voucher SA2163b small subunit ribosomal RNA gene, partial sequence; internal transcribed spacer 1, 5.8S ribosomal RNA gene, and internal transcribed spacer 2, complete sequence; and large subunit ribosomal RNA gene, partial sequence	DNA	Fri May 01 00:00:00 EDT 2020	AGGTTTCCGTAGGTGAACCTGCGGAAGGATCATTACCGATGTGAAAAAATCCAAGGTTAAACATCATTAACCAGTGTGAACTGTGAAACAACTCTTTAGGGGTCGGCACAGGCGTGTGTCGTTAAATGGCGGATAGGTTCCTTCCGCCAGCCCCGCCATTGTGTTTATGATATCACTTTGAACGTTTAAGACTGAGAACGTATGTATCATGCATGAAATGTATGAGAAAGAAGGAAAGAAAAATGAGAGACAACTTTTGACGGTGGATCTCTTGGCTCACGTATCGATGAAGAACGCAGCCAGCTGCGATATGTAGTGTGAATTGCAGAATTCAGTGAATCATTGAATCTTTGAACGCAAATGGCGCTCTTGGGTTCTCCCAGGAGCATGTCTGTCTGA…	667	Eukaryota; Metazoa; Cnidaria; Anthozoa; Hexacorallia; Scleractinia; Fungiina; Poritidae; Porites		Red Sea	taxon:51062		SA2163b			Sanger dideoxy sequencing
MK881283	0.444	MK881283.1	Porites lobata	Porites lobata voucher SA2194a small subunit ribosomal RNA gene, partial sequence; internal transcribed spacer 1, 5.8S ribosomal RNA gene, and internal transcribed spacer 2, complete sequence; and large subunit ribosomal RNA gene, partial sequence	DNA	Fri May 01 00:00:00 EDT 2020	AGGTTTCCGTAGGTGAACCTGCGGAAGGATCATTACCGATGTGAAAAAATCCAAGGTTAAACATCATTAACCAACCAGTGTGAACTGTGAAACAACTCTTTAGGGGTCGGCACAGGCGTGTGTCGTTAAATGGCGGATAGGTTCCTTCCGCCAGCCCCGCCATTGTGTTTATGATATCCCTTTGAACGTTTAAGACTGAGAACGTATGTATCATGCATTAAATGTATGAGAAAGAAAGAAAGAAAAATGAGAGACAACTTTTGACGGTGGATCTCTTGGCTCACGTATCGATGAAGAACGCAGCCAGCTGCGATATGTAGTGTGAATTGCAGAATTCAGTGAATCATTGAATCTTTGAACGCAAATGGCGCTCTTGGGTTCTCCCAGGAGCATGTCTGT…	671	Eukaryota; Metazoa; Cnidaria; Anthozoa; Hexacorallia; Scleractinia; Fungiina; Poritidae; Porites		Red Sea	taxon:104759		SA2194a			Sanger dideoxy sequencing
MK881284	0.445	MK881284.1	Porites lobata	Porites lobata voucher SA2194b small subunit ribosomal RNA gene, partial sequence; internal transcribed spacer 1, 5.8S ribosomal RNA gene, and internal transcribed spacer 2, complete sequence; and large subunit ribosomal RNA gene, partial sequence	DNA	Fri May 01 00:00:00 EDT 2020	AGGTTTCCGTAGGTGAACCTGCGGAAGGATCATTACCGATGTGAAAAAATCCAAGGTTAAACATCATTAACCAACCAGTGTGAACTGTGAAACAACTCTTTAGGGGTCGGCACAGGCGTGTGTCGTTAAATGGCGGATAGGTTCCTTCCGCCAGCCCCGCCATTGTGTTTATGATATCACTTTGAACGTTTAAGACTGAGAACGTATGTATCATGCATTAAATGTATGAGAAAGAAGGAAAGAAAAATGAGAGACAACTTTTGACGGTGGATCTCTTGGCTCACGTATCGATGAAGAACGCAGCCAGCTGCGATATGTAGTGTGAATTGCAGAATTCAGTGAATCATTGAATCTTTGAACGCAAATGGCGCTCTTGGGTTCTCCCAGGAGCATGTCTGT…	670	Eukaryota; Metazoa; Cnidaria; Anthozoa; Hexacorallia; Scleractinia; Fungiina; Poritidae; Porites		Red Sea	taxon:104759		SA2194b			Sanger dideoxy sequencing
MK881285	0.445	MK881285.1	Porites annae	Porites annae voucher SA2195 small subunit ribosomal RNA gene, partial sequence; internal transcribed spacer 1, 5.8S ribosomal RNA gene, and internal transcribed spacer 2, complete sequence; and large subunit ribosomal RNA gene, partial sequence	DNA	Fri May 01 00:00:00 EDT 2020	AGGTTTCCGTAGGTGAACCTGCGGAAGGATCATTACCGATGTGAAAAATCCAAGGTTAAACATCATTAACCAACCAGTGTGAACTGTGAAACAACTCTTTAGGGGTCGGCACAGGCGTGTGTCGTTAAATGGCGGATAGGTTCCTTCCGCCAGCCCCGCCATTGTGTTTATGATATCACTTTGAACGTTTAAGACTGAGAACGTATGTATCATGCATTAAATGTATGAGAAAGAAGGAAAGAAAAATGAGAGACAACTTTTGACGGTGGATCTCTTGGCTCACGTATCGATGAAGAACGCAGCCAGCTGCGATATGTAGTGTGAATTGCAGAATTCAGTGAATCATTGAATCTTTGAACGCAAATGGCGCTCTTGGGTTCTCCCAGGAGCATGTCTGTC…	670	Eukaryota; Metazoa; Cnidaria; Anthozoa; Hexacorallia; Scleractinia; Fungiina; Poritidae; Porites		Red Sea	taxon:596308		SA2195			Sanger dideoxy sequencing
MK881292	0.445	MK881292.1	Porites lutea	Porites lutea voucher SA2295 small subunit ribosomal RNA gene, partial sequence; internal transcribed spacer 1, 5.8S ribosomal RNA gene, and internal transcribed spacer 2, complete sequence; and large subunit ribosomal RNA gene, partial sequence	DNA	Fri May 01 00:00:00 EDT 2020	AGGTTTCCGTAGGTGAACCTGCGGAAGGATCATTACCGATGTGAAAAATCCAAGGTTAAACATCATTAACCAACCAGTGTGAACTGTGAAACAACTCTTTAGGGGTCGGCACAGGCGTGTGTCGTTAAATGGCGGATAGGTTCCTTCCGCCAGCCCCGCCATTGTGTTTATGATATCACTTTGAACGTTTAAGACTGAGAACGTATGTATCATGCATTAAATGTATGACAAAGAAGGAAAGAAAAATGAGAGACAACTTTTGACGGTGGATCTCTTGGCTCACGTATCGATGAAGAACGCAGCCAGCTGCGATATGTAGTGTGAATTGCAGAATTCAGTGAATCATTGAATCTTTGAACGCAAATGGCGCTCTTGGGTTCTCCCAGGAGCATGTCTGTC…	674	Eukaryota; Metazoa; Cnidaria; Anthozoa; Hexacorallia; Scleractinia; Fungiina; Poritidae; Porites		Red Sea	taxon:51062		SA2295			Sanger dideoxy sequencing
MK881293	0.446	MK881293.1	Porites annae	Porites annae voucher SA2332 small subunit ribosomal RNA gene, partial sequence; internal transcribed spacer 1, 5.8S ribosomal RNA gene, and internal transcribed spacer 2, complete sequence; and large subunit ribosomal RNA gene, partial sequence	DNA	Fri May 01 00:00:00 EDT 2020	AGGTTTCCGTAGGTGAACCTGCGGAAGGATCATTACCGATGTGAAAAATCCAAGGTTAAACATCATTAACCAACCAGTGTGAACTGTGAAACAACTCTTTAGGGGTCGGCACAGGCGTGTGTCGTTAAATGGCGGATAGGTTCCTTCCGCCAGCCCCGCCATTGTGTTTATGATATCCCTTTGAACGTTAAAGACTGAGAACGTATGTATCATGCATTAAATGTATGAGAAAGAAGGAAAGAAAAATGAGAGACAACTTTTGACGGTGGATCTCTTGGCTCACGTATCGATGAAGAACGCAGCCAGCTGCGATATGTAGTGTGAATTGCAGAATTCAGTGAATCATTGAATCTTTGAACGCAAATGGCGCTCTTGGGTTCTCCCAGGAGCATGTCTGTC…	670	Eukaryota; Metazoa; Cnidaria; Anthozoa; Hexacorallia; Scleractinia; Fungiina; Poritidae; Porites		Red Sea	taxon:596308		SA2332			Sanger dideoxy sequencing
MK881295	0.444	MK881295.1	Porites lutea	Porites lutea voucher SA2375a small subunit ribosomal RNA gene, partial sequence; internal transcribed spacer 1, 5.8S ribosomal RNA gene, and internal transcribed spacer 2, complete sequence; and large subunit ribosomal RNA gene, partial sequence	DNA	Fri May 01 00:00:00 EDT 2020	AGGTTTCCGTAGGTGAACCTGCGGAAGGATCATTACCGATGTGAAAAAATCCAAGGTTAAACATCATTAACCAACCAGTGTGAACTGTGAAACAACTCTTTAGGGGTCGGCACAGGCGTGTGTCGTTAAATGGCGGATAGGTTCCTTCCGCCAGCCCCGCCATTGTGTTTATGATATCACTTTGAACGTTAAAGACTGAGAACGTATGTATCATGCATTAAATGTATGAGAAAGAAGGAAAGAAAAATGAGAGACAACTTTTGACGGTGGATCTCTTGGCTCACGTATCGATGAAGAACGCAGCCAGCTGCGATATGTAGTGTGAATTGCAGAATTCAGTGAATCATTGAATCTTTGAACGCAAATGGCGCTCTTGGGTTCTCCCAGGAGCATGTCTGT…	671	Eukaryota; Metazoa; Cnidaria; Anthozoa; Hexacorallia; Scleractinia; Fungiina; Poritidae; Porites		Red Sea	taxon:51062		SA2375a			Sanger dideoxy sequencing
MK881296	0.446	MK881296.1	Porites lutea	Porites lutea voucher SA2375b small subunit ribosomal RNA gene, partial sequence; internal transcribed spacer 1, 5.8S ribosomal RNA gene, and internal transcribed spacer 2, complete sequence; and large subunit ribosomal RNA gene, partial sequence	DNA	Fri May 01 00:00:00 EDT 2020	AGGTTTCCGTAGGTGAACCTGCGGAAGGATCATTACCGATGTGAAAAAATCCAAGGTTAAACATCATTAACCAACCAGTGTGAACTGTGAAACAACTCTTTAGGGGTCGGCACAGGCGTGTGTCGTTAAATGGCGGATAGGTTCCTTCCGCCAGCCCCGCCATTGTGTTTATGATATCACTTTGAACGTTTAAGACTGAGAACGTATGTATCATGCATTAAATGTATGAGAAAGAAGGAAAGAAAAATGAGAGACAACTTTTGACGGTGGATCTCTTGGCTCACGTATCGATGAAGAACGCAGCCAGCTGCGATATGTAGTGTGAATTGCAGAATTCAGTGAATCATTGAATCTTTGAACGCAAATGGCGCTCTTGGGTTCTCCCAGGAGCATGTCTGT…	671	Eukaryota; Metazoa; Cnidaria; Anthozoa; Hexacorallia; Scleractinia; Fungiina; Poritidae; Porites		Red Sea	taxon:51062		SA2375b			Sanger dideoxy sequencing
MK881297	0.446	MK881297.1	Porites annae	Porites annae voucher SA2432a small subunit ribosomal RNA gene, partial sequence; internal transcribed spacer 1, 5.8S ribosomal RNA gene, and internal transcribed spacer 2, complete sequence; and large subunit ribosomal RNA gene, partial sequence	DNA	Fri May 01 00:00:00 EDT 2020	AGGTTTCCGTAGGTGAACCTGCGGAAGGATCATTACCGATGTGAAAAATCCAAGGTTAAACATCATTAACCAACCAGTGGGAACTGTGAAACAACTCTTTAGGGGTCGGCACAGGCGTGTGTCGTTAAATGGCGGATAGGTTCCTTCCGCCAGCCCCGCCATTGTGTTTATGATATCCCTTTGAACGTTTAAAACTGAGAACGTATGTATCATGCATTAAATGTATGAGAAAGAAGGAAAGAAAAATGAGAGACAACTTTTGACGGTGGATCTCTTGGCTCACGTATCGATGAAGAACGCAGCCAGCTGCGATATGTAGTGTGAATTGCAGAATTCAGTGAATCATTGAATCTTTGAACGCAAATGGCGCTCTTGGGTTCTCCCAGGAGCATGTCTGTC…	670	Eukaryota; Metazoa; Cnidaria; Anthozoa; Hexacorallia; Scleractinia; Fungiina; Poritidae; Porites		Red Sea	taxon:596308		SA2432a			Sanger dideoxy sequencing
MK881298	0.443	MK881298.1	Porites annae	Porites annae voucher SA2432b small subunit ribosomal RNA gene, partial sequence; internal transcribed spacer 1, 5.8S ribosomal RNA gene, and internal transcribed spacer 2, complete sequence; and large subunit ribosomal RNA gene, partial sequence	DNA	Fri May 01 00:00:00 EDT 2020	AGGTTTCCGTAGGTGAACCTGCGGAAGGATCATTACCGATGTGAAAAAATCCAAGGTTAAACATCATTAACCAACCAGTGGGAACTGTGAAACAACTCTTTAGGGGTCGGCACAGGCGTGTGTCGTTAAATGGCGGATAGGTTCCTTCCGCCAGCCCCGCCATTGTGTTTATTATATCACTTTGAACGTTAAAGACTGAGAACTATGTATCATGCATTAAATGTATGAGAAAGAAGGAAAGAAAAATGAGAGACAACTTTTGACGGTGGATCTCTTGGCTCACGTATCGATGAAGAACGCAGCCAGCTGCGATATGTAGTGTGAATTGCAGAATTCAGTGAATCATTGAATCTTTGAACGCAAATGGCGCTCTTGGGTTCTCCCAGGAGCATGTCTGTC…	670	Eukaryota; Metazoa; Cnidaria; Anthozoa; Hexacorallia; Scleractinia; Fungiina; Poritidae; Porites		Red Sea	taxon:596308		SA2432b			Sanger dideoxy sequencing
MK881300	0.445	MK881300.1	Porites solida	Porites solida voucher SA2525a small subunit ribosomal RNA gene, partial sequence; internal transcribed spacer 1, 5.8S ribosomal RNA gene, and internal transcribed spacer 2, complete sequence; and large subunit ribosomal RNA gene, partial sequence	DNA	Fri May 01 00:00:00 EDT 2020	AGGTTTCCGTAGGTGAACCTGCGGAAGGATCATTACCGATGTGAAAAATCCAAGGTTAAACATCATTAACCAACCAGTGTGAACTGTACAACAACTCTTTAGGGGTCGGCACAGGCGTGTGTCGTTAAATGGCGGATAGGTTCCTTCCGCCAGCCCCGCCATTGTGTTTATGATATCACTTTGAACGTTAAAGACTGAGAACGTATGTATCATGCATTAAATGTATGAGAAAGAAGGAAAGAAAAATGAGAGACAACTTTTGACGGTGGATCTCTTGGCTCACGTATCGATGAAGAACGCAGCCAGCTGCGATATGTAGTGTGAATTGCAGAATTCAGTGAATCATTGAATCTTTGAACGCAAATGGCGCTCTTGGGTTCTCCCAGGAGCATGTCTGTC…	670	Eukaryota; Metazoa; Cnidaria; Anthozoa; Hexacorallia; Scleractinia; Fungiina; Poritidae; Porites		Red Sea	taxon:627028		SA2525a			Sanger dideoxy sequencing
MK881301	0.446	MK881301.1	Porites solida	Porites solida voucher SA2525b small subunit ribosomal RNA gene, partial sequence; internal transcribed spacer 1, 5.8S ribosomal RNA gene, and internal transcribed spacer 2, complete sequence; and large subunit ribosomal RNA gene, partial sequence	DNA	Fri May 01 00:00:00 EDT 2020	AGGTTTCCGTAGGTGAACCTGCGGAAGGATCATTACCGATGTGAAAAATCCAAGGTTAAACATCATTAACCAACCAGTGTGAACTGTACAACAACTCTTTAGGGGTCGGCACAGGCGTGTGTCGTTAAATGGCGGATAGGTTCCTTCCGCCAGCCCCGCCATTGTGTTTATGATATCACTTTGAACGTTAAAGACTGAGAACGTATGTATCATGCATTAAATGTATGAGAAAGAAGGAAAGAAAAATGAGAGACAACTTTTGACGGTGGATCTCTTGGCTCACGTATCGATGAAGAACGCAGCCAGCTGCGATATGTAGTGTGAATTGCAGAATTCAGTGAATCATTGAATCTTTGAACGCAAATGGCGCTCTTGGGTTCTCCCAGGAGCATGTCTGTC…	670	Eukaryota; Metazoa; Cnidaria; Anthozoa; Hexacorallia; Scleractinia; Fungiina; Poritidae; Porites		Red Sea	taxon:627028		SA2525b			Sanger dideoxy sequencing
MK965507	0.446	MK965507.1	Porites echinulata	Porites echinulata voucher AD007 small subunit ribosomal RNA gene, partial sequence; internal transcribed spacer 1, 5.8S ribosomal RNA gene, and internal transcribed spacer 2, complete sequence; and large subunit ribosomal RNA gene, partial sequence	DNA	Mon Jun 01 00:00:00 EDT 2020	AGGTTTCCGTAGGTGAACGTGCGGAAGGATCATTACCGATGTGAAAAAATCCAAGGTTAAACATCATTAACCAACCAGTGTGAACTGTGAAACAACTCTTTAGGGGTCGGCACAGGCGTGTGTCGTTAAATGGCGGATAGGTTCCTTCCGCCAGCCCCGCCATTGTGTTTATGATATCACTTTGAACGTTAAAGACTGAGAACGTATGTATCATGCATTAAATGTATGAGAAAGAAGGAAAGAAAAATGAGAGACAACTTTTGACGGTGGATCTCTTGGCTCACGTATCGATGAAGAACGCAGCCAGCTGCGATATGTAGTGTGAATTGCAGAATTCAGTGAATCATTGAATCTTTGAACGCAAATGGCGCTCTTGGGTTCTCCCAGGAGCATGTCTGT…	675	Eukaryota; Metazoa; Cnidaria; Anthozoa; Hexacorallia; Scleractinia; Fungiina; Poritidae; Porites		Red Sea	taxon:627003		AD007			Sanger dideoxy sequencing
MK965509	0.445	MK965509.1	Porites lutea	Porites lutea voucher BA098 small subunit ribosomal RNA gene, partial sequence; internal transcribed spacer 1, 5.8S ribosomal RNA gene, and internal transcribed spacer 2, complete sequence; and large subunit ribosomal RNA gene, partial sequence	DNA	Mon Jun 01 00:00:00 EDT 2020	AGGTTTCCGTAGGTGAACCTGCGGAAGGATCATTACCGATGTGAAAAAATCCAAGGTTAAACATCATTAACCAACCAGTGTGAACTGTGAAACAACTCTTTAGGGGTCGGCACAGGCGTGTGTCGTTAAATGGCGGATAGGTTCCTTCCGCCAGCCCCGCCATTGTGTTTATGATATCACTTTGAACGTTAAAGACTGAGAACGTATGTATCATGCATAATACAATGTATGAGAAAGAAGGAAAGAAAAATGAGAGACAACTTTTGACGGTGGATCTCTTGGCTCACGTATCGATGAAGAACGCAGCCAGCTGCGATATGTAGTGTGAATTGCAGAATTCAGTGAATCATTGAATCTTTGAACGCAAATGGCGCTCTTGGGTTCTCCCAGGAGCATGTC…	678	Eukaryota; Metazoa; Cnidaria; Anthozoa; Hexacorallia; Scleractinia; Fungiina; Poritidae; Porites		Red Sea	taxon:51062		BA098			Sanger dideoxy sequencing
KT750818	0.48	KT750818.1	Siderastrea radians	Siderastrea radians isolate Srg1 18S ribosomal RNA gene, partial sequence; internal transcribed spacer 1 and 5.8S ribosomal RNA gene, complete sequence; and internal transcribed spacer 2, partial sequence	DNA	Sun Feb 28 00:00:00 EST 2016	ACAGAGCGCCGGATGCCGGGAAGTTGGTCAAACTTGATCATTTAGAGGAAGTAAAAGTCGTAACAAGGTTTCCGTAGGTGAACCTGCGGAAGGATCATTACCGATACGTGTCAAGGTTAACTTTAATGTTACCTACCGTGTGAATGGTACTCAACCTTTTAGGGGTCGGCCTGATGTGCCGTTAAATGGTCGTCCGTCGTTGACTCGGCGTTCGGTCAGCCCCGCCTTTGTATTCTTTATATCAAACTTTGTTCAGTCTGAAAACAATTGTGCTACTCTTAAAAAGGTAGTAACAAATGAGAAAAAAAGAGAGACAACTTTTAACGGTGGATCTCTTGGCTCACGCATCGATGAAGAACGCAGCCAGCTGCGATAAGTAGTGTGAATTGCAGAATTCAG…	581	Eukaryota; Metazoa; Cnidaria; Anthozoa; Hexacorallia; Scleractinia; Fungiina; Siderastreidae; Siderastrea			taxon:214988	Srg1
KT750827	0.474	KT750827.1	Siderastrea radians	Siderastrea radians isolate Srg4 18S ribosomal RNA gene, partial sequence; internal transcribed spacer 1 and 5.8S ribosomal RNA gene, complete sequence; and internal transcribed spacer 2, partial sequence	DNA	Sun Feb 28 00:00:00 EST 2016	ACAGCGGGTTGGATGTGGGTGAGTTGGACAAAATTGATCATTTAGAGGAAGTAAAAGTCGTAACAAGGTTTCCGTAGGTGAACCTGCGGAAGGATCATTACCGATACGTGTCAAAGGTTAACTTTAATGTTACCTACCGTGTGAATGGTACTCAACCTTTTAGGGGTCGGCCTGATGGGCCGTTAAATGGTCGTCAGTCGTTGACTCGGCGTTCGGTCAGCCCCGCCTTTGTATTCTTTATATCAAACTTTGTTCAGTCTGAAAACAATTGTGCTACTCTTAAAAAGGTAGTAACAAATGAGAAAAAAAGAGAGACAACTTTTAACGGTGGATCTCTTGGCTCACGCATCGATGAAGAACGCAGCCAGCTGCGATAAGTAGTGTGAATTGCAGAATTCA…	582	Eukaryota; Metazoa; Cnidaria; Anthozoa; Hexacorallia; Scleractinia; Fungiina; Siderastreidae; Siderastrea			taxon:214988	Srg4
KT750832	0.478	KT750832.1	Siderastrea radians	Siderastrea radians isolate Srga1 18S ribosomal RNA gene, partial sequence; internal transcribed spacer 1 and 5.8S ribosomal RNA gene, complete sequence; and internal transcribed spacer 2, partial sequence	DNA	Sun Feb 28 00:00:00 EST 2016	ACAGAGCGCCGGATGCCGAGAAGTTGGTCAAAATTGATCATTTAGAGGAAGTAAAAGTCGTAACAAGGTTTCCGTAGGTGAACCTGCGGAAGGATCATTACCGATACGTGTCCAAGGTTAACTTTAATGTTACCTACCGTGTGAATGGTACTCAACCTTTTAGGGGTCGGCCTGATGTGCCGTTAAATGGTCGTCCGTCGTTGACTCGGCGCTCGGTCAGCCCCGCCTTTGTATTCTTTATATCAAACTTTGTTCAGTCTGAAAACAATTGTGCTACTCTTAAAAAGGTAGTAACAAATGAGAAAAAAAGAGAGACAACTTTTAACGGTGGATCTCTTGGCTCACGCATCGATGAAGAACGCAGCCAGCTGCGATAAGTAGTGTGAATTGCAGAATTCA…	582	Eukaryota; Metazoa; Cnidaria; Anthozoa; Hexacorallia; Scleractinia; Fungiina; Siderastreidae; Siderastrea			taxon:214988	Srga1
KT750834	0.479	KT750834.1	Siderastrea siderea	Siderastrea siderea isolate Ssga3 18S ribosomal RNA gene, partial sequence; internal transcribed spacer 1 and 5.8S ribosomal RNA gene, complete sequence; and internal transcribed spacer 2, partial sequence	DNA	Sun Feb 28 00:00:00 EST 2016	ACAGAGCGCCGGATGCCGGGAAGTTGGTCAAAATTGATCATTTAGAGGAAGTAAAAGTCGTAACAAGGTTTCCGTAGGTGAACCTGCGGAAGGATCATTACCGATACGTGTCCAAGGTTAACTTTAATGTTACCTACCGTGTGAATGGTACTCAACCTTTTAGGGGTCGGCCTGATGTGCCGTTAAATGGTCGTCCGTCGTTGACTCGGCGTTCGGTCAGCCCCGCCTTTGTATTCTTTATATCAAACTTTGTTCAGTCTGAAAACAATTGTGCTACTCTTAAAAAGGTAGTAACAAATGAGAAAAAAAGAGAGACAACTTTTAACGGTGGATCTCTTGGCTCACGCATCGATGAAGAACGCAGCCAGCTGCGATAAGTAGTGTGAATTGCAGAATTCA…	582	Eukaryota; Metazoa; Cnidaria; Anthozoa; Hexacorallia; Scleractinia; Fungiina; Siderastreidae; Siderastrea			taxon:130672	Ssga3
KT750835	0.479	KT750835.1	Siderastrea stellata	Siderastrea stellata isolate Sstga5 18S ribosomal RNA gene, partial sequence; internal transcribed spacer 1 and 5.8S ribosomal RNA gene, complete sequence; and internal transcribed spacer 2, partial sequence	DNA	Sun Feb 28 00:00:00 EST 2016	ACAGAGCGCCGGATGCCGGGAAGTTGGTCAAAATTGATCATTTAGAGGAAGTAAAAGTCGTAACAAGGTTTCCGTAGGTGAACCTGCGGAAGGATCATTACCGATACGTGTCCAAGGTTAACTTTAATGTTACCTACCGTGTGAATGGTACTCAACCTTTTAGGGGTCGGCCTGATGTGCCGTTAAATGGTCGTCCGTCGTTGACTCGGCGTTCGGTCAGCCCCGCCTTTGTATTCTTTATATCAAACTTTGTTCAGTCTGAAAACAATTGTGCTACTCTTAAAAAGGTAGTAACAAATGAGAAAAAAAGAGAGACAACTTTTAACGGTGGATCTCTTGGCTCACGCATCGATGAAGAACGCAGCCAGCTGCGATAAGTAGTGTGAATTGCAGAATTCA…	582	Eukaryota; Metazoa; Cnidaria; Anthozoa; Hexacorallia; Scleractinia; Fungiina; Siderastreidae; Siderastrea			taxon:247026	Sstga5
KT750836	0.479	KT750836.1	Siderastrea stellata	Siderastrea stellata isolate Ssrga4 18S ribosomal RNA gene, partial sequence; internal transcribed spacer 1 and 5.8S ribosomal RNA gene, complete sequence; and internal transcribed spacer 2, partial sequence	DNA	Sun Feb 28 00:00:00 EST 2016	ACAGAGCGCCGGATGCCGGGAAGTTGGTCAAAATTGATCATTTAGAGGAAGTAAAAGTCGTAACAAGGTTTCCGTAGGTGAACCTGCGGAAGGATCATTACCGATACGTGTCCAAGGTTAACTTTAATGTTACCTACCGTGTGAATGGTACTCAACCTTTTAGGGGTCGGCCTGATGTGCCGTTAAATGGTCGTCCGTCGTTGACTCGGCGTTCGGTCAGCCCCGCCTTTGTATTCTTTATATCAAACTTTGTTCAGTCTGAAAACAATTGTGCTACTCTTAAAAAGGTAGTAACAAATGAGAAAAAAAGAGAGACAACTTTTAACGGTGGATCTCTTGGCTCACGCATCGATGAAGAACGCAGCCAGCTGCGATAAGTAGTGTGAATTGCAGAATTCA…	582	Eukaryota; Metazoa; Cnidaria; Anthozoa; Hexacorallia; Scleractinia; Fungiina; Siderastreidae; Siderastrea			taxon:247026	Ssrga4
KT750837	0.479	KT750837.1	Siderastrea siderea	Siderastrea siderea isolate Ssga1 18S ribosomal RNA gene, partial sequence; internal transcribed spacer 1 and 5.8S ribosomal RNA gene, complete sequence; and internal transcribed spacer 2, partial sequence	DNA	Sun Feb 28 00:00:00 EST 2016	ACAGAGCGCCGGATGCCGGGAAGTTGGTCAAAATTGATCATTTAGAGGAAGTAAAAGTCGTAACAAGGTTTCCGTAGGTGAACCTGCGGAAGGATCATTACCGATACGTGTCCAAGGTTAACTTTAATGTTACCTACCGTGTGAATGGTACTCAACCTTTTAGGGGTCGGCCTGATGTGCCGTTAAATGGTCGTCCGTCGTTGACTCGGCGTTCGGTCAGCCCCGCCTTTGTATTCTTTATATCAAACTTTGTTCAGTCTGAAAACAATTGTGCTACTCTTAAAAAGGTAGTAACAAATGAGAAAAAAAGAGAGACAACTTTTAACGGTGGATCTCTTGGCTCACGCATCGATGAAGAACGCAGCCAGCTGCGATAAGTAGTGTGAATTGCAGAATTCA…	582	Eukaryota; Metazoa; Cnidaria; Anthozoa; Hexacorallia; Scleractinia; Fungiina; Siderastreidae; Siderastrea			taxon:130672	Ssga1
KT750838	0.478	KT750838.1	Siderastrea siderea	Siderastrea siderea isolate Ssga2 18S ribosomal RNA gene, partial sequence; internal transcribed spacer 1 and 5.8S ribosomal RNA gene, complete sequence; and internal transcribed spacer 2, partial sequence	DNA	Sun Feb 28 00:00:00 EST 2016	ACAGAGCGCCGGATGCCGGGAAGTTGGTCAAACTTGATCATTTAGAGGAAGTAAAAGTCGTAACAAGGTTTCCGTAGGTGAACCTGCGGAAGGATCATTACCGATACGTGTCCAAGGTTAACTTTAATGTTACCTACCGTGTGAATGGTACTCAACCTTTTAGGAGTCGGCCTGATGTGCCGTTAAATGGTCGTCAGTCGTTGACTCGGCGTTCGGTCAGCCCCGCCTTTGTATTCTTTATATCAAACTTTGTTCAGTCTGAAAACAATTGTGCTACTCTTAAAAAGGTAGTAACAAATGAGAAAAAAAGAGAGACAACTTTTAACGGTGGATCTCTTGGCTCACGCATCGATGAAGAACGCAGCCAGCTGCGATAAGTAGTGTGAATTGCAGAATTCA…	582	Eukaryota; Metazoa; Cnidaria; Anthozoa; Hexacorallia; Scleractinia; Fungiina; Siderastreidae; Siderastrea			taxon:130672	Ssga2
KT750839	0.474	KT750839.1	Siderastrea stellata	Siderastrea stellata isolate Ssrg1 18S ribosomal RNA gene, partial sequence; internal transcribed spacer 1 and 5.8S ribosomal RNA gene, complete sequence; and internal transcribed spacer 2, partial sequence	DNA	Sun Feb 28 00:00:00 EST 2016	AAAGAGCGCCGGATGCCCGGAAGTTGGTCAAAATTGATCATTTAGAGGAAGTAAAAGTCGTAACAAGGTTTCCGTAGGTGAACCTGCGGAACGATCATTACCGATACGTGTCAAAGGTTAACTTTAATGTTACCTACCGTGTGAATGGTACTCAACCTTTTAGGGGTCGGCCTGATGTGCCGTTAAATGGTCGACCATCGTTGACTCGGCGTTCGGTCAGCCCCGCCTTTGTATTCTTTATATCAAACTTTGTTCAGTCTGAAAACAATTGTGCTACTCTTAAAAAGGTAGTAACAAATGAGAAAAAAAGAGAGACAACTTTTAACGGTGGATCTCTTGGCTCACGCATCGATGAAGAACGCAGCCAGCTGCGATAAGTAGTGTGAATTGCAGAATTCA…	582	Eukaryota; Metazoa; Cnidaria; Anthozoa; Hexacorallia; Scleractinia; Fungiina; Siderastreidae; Siderastrea			taxon:247026	Ssrg1
OR522649	0.579	OR522649.1	Galaxea fascicularis	Galaxea fascicularis isolate M43 small subunit ribosomal RNA gene, partial sequence; internal transcribed spacer 1, 5.8S ribosomal RNA gene, and internal transcribed spacer 2, complete sequence; and large subunit ribosomal RNA gene, partial sequence	DNA	Mon Sep 11 00:00:00 EDT 2023	CGGATGGACGCTGCCGGGGCTCCGCCTCGGCGACGGCCGCCGGAAAGTTGCTCAAACTTGATCATTTAGAGGAAGTAAAAGTCGTAACAAGGTTTCCGTAGGTGAACCTGCGGAAGGATCATTACCGATCCCAATCCTCGTGCATCCTGCACCTACTCTGTGAACCGGACCTCTACTCTTCACCTATGGGTCGGCCCCCGTGCCGTTAAGTGGTCGCTCGTCGTCCGAGAGTCCCTCTTCTCTCCTTCGGCGCCCGGGCGGCCCCGACTTTGTTTTTTTGTTTTTTACTTTGTCCGACTGAACCTGACCCGTCCCTCCCTCCTTCCCTCCTTCCTCCCTAACCAGGGGAGCGGGCAGGACGGATCCAACGCATAAACAAACAGAGACAACTTTTGACGG…	889	Eukaryota; Metazoa; Cnidaria; Anthozoa; Hexacorallia; Scleractinia; Faviina; Euphylliidae; Galaxea		China	taxon:46745	M43				Sanger dideoxy sequencing
AY722765	0.59	AY722765.1	Galaxea fascicularis	Galaxea fascularis clone PEN406.2 18S ribosomal RNA gene, partial sequence; internal transcribed spacer 1, 5.8S ribosomal RNA gene, and internal transcribed spacer 2, complete sequence; and 28S ribosomal RNA gene, partial sequence	DNA	Tue Sep 28 00:00:00 EDT 2004	ACTACCGATTGAATGGTTTAGTGAGGTCTCCTGACTGGCCCCGCTGCCGCGGCTCCGCCTCGGCGCCGGCCGCCGGAAAGTTGCTCAAACTTGATCATTTAGAGGAAGTAAAAGTCGTAACAAGGTTTCCGTAGGTGAACCTGCGGAAGGATCATTACCGATCCCAATCCTCCCATAGCGTGCATCCCGCACCTTGCCTTGTGAACCGTACCTCTACTCTTCACCTAGGGGTCGGCCCCCGTGCCGTTAAATGGTCGCTCGTCGTCCGAGAGTCCCTCTTCTCTCCCTCGGCGCCCGGCCGGCCCCGACTTTGTTTTTTTGCCAAAGACTTTGTCCGACTGAACCTGACCCGTCCCTCCCTCCTTCCTTCTCTCCCTCCTTCCTTGTCCGGGAGGCAGG…	1095	Eukaryota; Metazoa; Cnidaria; Anthozoa; Hexacorallia; Scleractinia; Faviina; Euphylliidae; Galaxea	PEN406.2	Taiwan: Penghu Island	taxon:46745
AY722764	0.598	AY722764.1	Galaxea fascicularis	Galaxea fascularis clone PEN406.1 18S ribosomal RNA gene, partial sequence; internal transcribed spacer 1, 5.8S ribosomal RNA gene, and internal transcribed spacer 2, complete sequence; and 28S ribosomal RNA gene, partial sequence	DNA	Tue Sep 28 00:00:00 EDT 2004	ACTACCGATTGAATGGTTTAGTGAGGTCTCCTGACTGGCCCCGCTGCCGCGGCTCCGCCTCGGCGCCGGCCGCCGGAAAGTTGCTCAAACTTGATCATTTAGAGGAAGTAAAAGTCGTAACAAGGTTTCCGTAGGTGAACCTGCGGAAGGATCATTACCGATCCACATCCTCCAATAGCGTGCATCCCGCACCTTACCTTGTGAACCGTACCTCTACTCTTCACCTAGGGGTCGGCCCCCGTGCCGTTAAATGGTCGCTCGTCGTCCGAGAGTCCCTGTTCTCTCCTTCGGCGCCCGGCCGGCCCCGACTTTGTTTTTTTTGCCAAAGACATTGTCCGACTGAACCTGACCCGTCCCTCCCTCCTTCCTTCTCTCCCTCCTTCCTTGTCTGGGAGGCAG…	1122	Eukaryota; Metazoa; Cnidaria; Anthozoa; Hexacorallia; Scleractinia; Faviina; Euphylliidae; Galaxea	PEN406.1	Taiwan: Penghu Island	taxon:46745

## Sheet: Table_S3
Table S3. Sampling and extraction metadata associated with coral specimens used for phylogenetic analysis.
Sample	Sampling Date	GFP Pattern	Species (putative)	DNA Extraction Date	DNA conc. (ng/µL)	Amplicon conc. (ng/ul)	Sequencing Strategy
P02	230315	Central_polyp	Porites lutea	230316	64	22.5	Paired
P03	230315	Diffuse	Porites lutea	230316	36.1	33.9	Unpaired
P04	230315	Tentacles	Porites lutea	230316	29.8	19.1	Unpaired
P05	230315	General_polyp	Porites lutea	230316	94.8	14.7	Unpaired
P06	230315	General_polyp	Porites lutea	230316	120	19.7	Paired
P07	230315	Diffuse	Porites lutea	230316	47.6	20.1	Paired
P08	230315	General_polyp	Porites lutea	230316	58	25.4	Paired
P09	230315	Central_polyp	Porites lutea	230330	28	21.4	Paired
P11	230315	Scarce	Porites lutea	230316	120	28	Paired
PE01	230328	Diffuse	Porites lutea	230330	35.4	24.3	Unpaired
PE02	230328	Central_polyp	Porites lutea	230330	16	26.5	Paired
PE03	230328	Intermediate	Porites lutea	230330	41.4	38.7	Unpaired
PE04	230328	Diffuse	Porites lutea	230330	32.8	32	Unpaired
PE05	230328	General_polyp	Porites lutea	230330	35.8	37.1	Paired
PL01	230316	Scarce	Porites lobata	230324	21.8	32	Unpaired
PL02	230316	Scarce	Porites lobata	230324	40.5	35.3	Unpaired
PL03	230316	Scarce	Porites lobata	230324	14.3	31.4	Unpaired
PL04	230316	Tentacles	Porites lobata	230324	35.4	28.8	Unpaired
PL05	230316	Star	Porites lobata	230324	60	32.9	Unpaired
PL06	230316	Star	Porites lobata	230324	28.6	34.8	Unpaired
PL07	230316	Star	Porites lobata	230324	22	37.5	Unpaired
PL08	230316	Star	Porites lobata	230324	59	38.5	Unpaired
PL09	230316	Diffuse	Porites lobata	230324	8.51	28.2	Paired
PL10	230316	Star	Porites lobata	230330	43.3	32	Unpaired
PL11	230316	General_polyp	Porites lobata	230324	23	32.1	Paired
PL12	230316	Tentacles	Porites lobata	230324	60	28.7	Paired
PL13	230316	Tentacles	Porites lobata	230324	31	30.5	Unpaired
